# Supplementary material for: Combined Inhibition of DNMT and HDAC Blocks the Tumorigenicity of Cancer Stem-like Cells and Attenuates Mammary Tumor Growth
Source: Oxford University Press journal article supplement (doi:10.1158/0008-5472.can-15-2249), 2016-04-06
Supplement: 00085472can152249-sup-154232_2_supp_3378332_w38wws.xlsx [file 00085472can152249-sup-154232_2_supp_3378332_w38wws.xlsx]

## Sheet: Sheet1
Supplementary Table S2 - Pathway and gene network analyses
GeneSymbol	LocusLink	Correlation	STDdev	GeneName	EntrezID	GeneConnections_network
RAD51AP1	10635	1	1.027	RAD51 associated protein 1	10635	ACTL6A;AMD1;ANP32E;APOBEC3B;ASPM;AURKA;AURKB;BIRC5;BLM;BUB1B;CBX3;CCNA2;CCNB1;CCNB2;CCNE2;CCT5;CCT6A;CDC2;CDC20;CDC25A;CDC45L;CDC6;CDC7;CDCA3;CDCA8;CDKN3;CDT1;CEBPG;CENPA;CENPE;CENPF;CENPN;CEP55;CHAF1B;CHEK1;CKS1B;CKS2;COQ2;CSE1L;CTPS;CTSL2;CXCL10;CYCS;DBF4;DEK;DKC1;DLGAP5;DNAJC9;DNMT1;DPM1;DTL;E2F1;EMG1;ERCC6L;ESPL1;EXO1;EZH2;FANCI;FEN1;GGH;GINS1;GPR19;GPSM2;GTSE1;H2AFZ;HDAC2;HJURP;HMGA1;HMGB2;H…
MAD2L1	4085	0.714	1.045	MAD2 mitotic arrest deficient-like 1 (yeast)	4085	ACTL6A;AMD1;ANP32E;APOBEC3B;ASPM;AURKA;AURKB;BIRC5;BLM;BUB1B;CBX3;CCNA2;CCNB1;CCNB2;CCNE2;CCT5;CCT6A;CDC2;CDC20;CDC45L;CDC6;CDC7;CDCA3;CDCA8;CDKN3;CDT1;CEBPG;CENPA;CENPE;CENPF;CENPN;CEP55;CHAF1B;CHEK1;CKS1B;CKS2;COQ2;CSE1L;CTPS;CTSL2;CXCL10;CYCS;DBF4;DEK;DKC1;DLGAP5;DNAJC9;DPM1;DTL;E2F1;ERCC6L;ESPL1;EXO1;EZH2;FANCI;FEN1;GGH;GINS1;GPR19;GPSM2;GTSE1;H2AFZ;HDAC2;HJURP;HMGA1;HMGB2;HMMR;HPRT1;IMPA2;KI…
MELK	9833	0.705	1.134	maternal embryonic leucine zipper kinase	9833	ACTL6A;AMD1;ANP32E;APOBEC3B;ASPM;AURKA;AURKB;BIRC5;BLM;BUB1B;CCNA2;CCNB1;CCNB2;CCNE2;CCT5;CCT6A;CDC2;CDC20;CDC25A;CDC45L;CDC6;CDC7;CDCA3;CDCA8;CDKN3;CDT1;CEBPG;CENPA;CENPE;CENPF;CENPN;CEP55;CHAF1B;CHEK1;CKS1B;CKS2;COQ2;CSE1L;CTPS;CTSL2;CXCL10;CYCS;DBF4;DEK;DKC1;DLGAP5;DNAJC9;DNMT1;DTL;E2F1;ERCC6L;ESPL1;EXO1;EZH2;FANCI;FEN1;GGH;GINS1;GPR19;GPSM2;GTSE1;H2AFZ;HDAC2;HJURP;HMGA1;HMGB2;HMMR;HPRT1;IMPA2…
TTK	7272	0.695	1.073	TTK protein kinase	7272	ACTL6A;AMD1;ANP32E;APOBEC3B;ASPM;AURKA;AURKB;BIRC5;BLM;BUB1B;CCNA2;CCNB1;CCNB2;CCNE2;CCT5;CCT6A;CDC2;CDC20;CDC25A;CDC45L;CDC6;CDC7;CDCA3;CDCA8;CDKN3;CDT1;CEBPG;CENPA;CENPE;CENPF;CENPN;CEP55;CHEK1;CKS1B;CKS2;CSE1L;CTPS;CTSL2;CXCL10;CYCS;DBF4;DEK;DLGAP5;DNAJC9;DNMT1;E2F1;ESPL1;EXO1;EZH2;FANCI;FEN1;GGH;GINS1;GPR19;GPSM2;GTSE1;HDAC2;HJURP;HMGA1;HMGB2;HMMR;HPRT1;IRAK1;KIAA0101;KIF11;KIF14;KIF15;KIF18A…
CDC2	983	0.693	1.053	cell division cycle 2, G1 to S and G2 to M	983	AMD1;ANP32E;APOBEC3B;ASPM;AURKA;AURKB;BIRC5;BLM;BUB1B;CBX3;CCNA2;CCNB1;CCNB2;CCNE2;CCT5;CCT6A;CDC20;CDC25A;CDC45L;CDC6;CDC7;CDCA3;CDCA8;CDKN3;CDT1;CEBPG;CENPA;CENPE;CENPF;CENPN;CEP55;CHAF1B;CHEK1;CKS1B;CKS2;COQ2;CSE1L;CTPS;CTSL2;CXCL10;CYCS;DBF4;DEK;DKC1;DLGAP5;DNAJC9;DTL;E2F1;ERCC6L;ESPL1;EXO1;EZH2;FANCI;FEN1;GGH;GINS1;GPR19;GPSM2;GTSE1;H2AFZ;HJURP;HMGB2;HMMR;HPRT1;IMPA2;KIAA0101;KIF11;KIF14;KIF…
CCNB2	9133	0.687	1.015	cyclin B2	9133	ACTL6A;AMD1;ANP32E;APOBEC3B;ASPM;AURKA;AURKB;BIRC5;BLM;BUB1B;CCNA2;CCNB1;CCNE2;CCT5;CCT6A;CDC2;CDC20;CDC25A;CDC45L;CDC6;CDC7;CDCA3;CDCA8;CDKN3;CDT1;CEBPG;CENPA;CENPE;CENPF;CENPN;CEP55;CHAF1B;CHEK1;CKS1B;CKS2;COQ2;CSE1L;CTPS;CTSL2;CXCL10;CYCS;DBF4;DEK;DLGAP5;DNAJC9;DTL;E2F1;ERCC6L;ESPL1;EXO1;EZH2;FANCI;FEN1;GGH;GINS1;GPR19;GPSM2;GTSE1;H2AFZ;HJURP;HMGA1;HMGB2;HMMR;HPRT1;IMPA2;IRAK1;KIAA0101;KIF11;K…
MCM6	4175	0.677	0.665	minichromosome maintenance complex component 6	4175	ACTL6A;AMD1;ANP32E;APOBEC3B;ASPM;AURKA;AURKB;BIRC5;BLM;BUB1B;CCNA2;CCNB2;CCNE2;CCT5;CCT6A;CDC2;CDC20;CDC25A;CDC45L;CDC6;CDC7;CDCA3;CDCA8;CDKN3;CDT1;CEBPG;CENPA;CENPE;CENPF;CENPN;CEP55;CHAF1B;CHEK1;CKS1B;CKS2;COQ2;CSE1L;CTPS;CTSL2;CXCL10;CYCS;DBF4;DEK;DLGAP5;DNAJC9;DNMT1;DTL;E2F1;ESPL1;EXO1;EZH2;FANCI;FEN1;GGH;GINS1;GPR19;GPSM2;GTSE1;H2AFZ;HDAC2;HJURP;HMGA1;HMGB2;HMMR;HPRT1;IMPA2;IRAK1;KIAA0101;KI…
CENPA	1058	0.675	1.036	centromere protein A	1058	AMD1;ANP32E;APOBEC3B;ASPM;AURKA;AURKB;BIRC5;BLM;BUB1B;CCNA2;CCNB1;CCNB2;CCNE2;CCT5;CCT6A;CDC2;CDC20;CDC25A;CDC45L;CDC6;CDC7;CDCA3;CDCA8;CDKN3;CDT1;CEBPG;CENPE;CENPF;CENPN;CEP55;CHAF1B;CHEK1;CKS1B;CKS2;COQ2;CSE1L;CTPS;CTSL2;CXCL10;CYCS;DBF4;DEK;DKC1;DLGAP5;DNAJC9;DNMT1;DTL;E2F1;ERCC6L;ESPL1;EXO1;EZH2;FANCI;FEN1;GGH;GINS1;GPR19;GPSM2;GTSE1;H2AFZ;HDAC2;HJURP;HMGA1;HMGB2;HMMR;HPRT1;IMPA2;IRAK1;KIAA01…
GINS1	9837	0.669	1.063	GINS complex subunit 1 (Psf1 homolog)	9837	ACTL6A;AMD1;ANP32E;APOBEC3B;ASPM;AURKA;AURKB;BIRC5;BLM;BUB1B;CCNA2;CCNB1;CCNB2;CCNE2;CCT5;CCT6A;CDC2;CDC20;CDC25A;CDC45L;CDC6;CDC7;CDCA3;CDCA8;CDKN3;CDT1;CEBPG;CENPA;CENPE;CENPF;CENPN;CEP55;CHAF1B;CHEK1;CKS1B;CKS2;CSE1L;CTPS;CTSL2;CYCS;DBF4;DEK;DKC1;DLGAP5;DNAJC9;DTL;E2F1;ERCC6L;ESPL1;EXO1;EZH2;FANCI;FEN1;GGH;GPR19;GPSM2;GTSE1;H2AFZ;HJURP;HMGB2;HMMR;HPRT1;IMPA2;IRAK1;KIAA0101;KIF11;KIF14;KIF18B;K…
DLGAP5	9787	0.665	1.032	discs, large (Drosophila) homolog-associated protein 5	9787	AMD1;ANP32E;APOBEC3B;ASPM;AURKA;AURKB;BIRC5;BLM;BUB1B;CCNA2;CCNB1;CCNB2;CCNE2;CCT5;CCT6A;CDC2;CDC20;CDC25A;CDC45L;CDC6;CDC7;CDCA3;CDCA8;CDKN3;CDT1;CEBPG;CENPA;CENPE;CENPF;CENPN;CEP55;CHAF1B;CHEK1;CKS1B;CKS2;COQ2;CSE1L;CTPS;CTSL2;CXCL10;CYCS;DBF4;DEK;DNAJC9;E2F1;ERCC6L;ESPL1;EXO1;EZH2;FANCI;FEN1;GGH;GINS1;GPR19;GPSM2;GTSE1;H2AFZ;HJURP;HMGA1;HMGB2;HMMR;HPRT1;IMPA2;IRAK1;KIAA0101;KIF11;KIF14;KIF15;K…
CCNA2	890	0.661	0.931	cyclin A2	890	AMD1;ANP32E;APOBEC3B;ASPM;AURKA;AURKB;BIRC5;BLM;BUB1B;CCNB2;CCNE2;CCT5;CDC2;CDC20;CDC25A;CDC45L;CDC6;CDC7;CDCA3;CDCA8;CDKN3;CDT1;CENPA;CENPE;CENPF;CEP55;CHEK1;CKS1B;CKS2;COQ2;CSE1L;CTPS;CTSL2;CXCL10;DBF4;DEK;DLGAP5;DNAJC9;DNMT1;E2F1;ESPL1;EXO1;EZH2;FANCI;FEN1;GGH;GINS1;GPR19;GPSM2;GTSE1;HJURP;HMGA1;HMGB2;HMMR;IRAK1;KIAA0101;KIF11;KIF14;KIF15;KIF18B;KIF20A;KIF23;KIF2C;KIF4A;KIFC1;KNTC1;KPNA2;MAD2L…
UBE2C	11065	0.646	0.883	ubiquitin-conjugating enzyme E2C	11065	AMD1;ANP32E;APOBEC3B;ASPM;AURKA;AURKB;BIRC5;BLM;BUB1B;CCNA2;CCNB1;CCNB2;CCNE2;CCT5;CDC2;CDC20;CDC25A;CDC45L;CDC6;CDC7;CDCA3;CDCA8;CDKN3;CDT1;CEBPG;CENPA;CENPE;CENPF;CENPN;CEP55;CHAF1B;CHEK1;CKS1B;CKS2;CSE1L;CTPS;CTSL2;CXCL10;CYCS;DBF4;DLGAP5;DNAJC9;DTL;E2F1;ERCC6L;ESPL1;EXO1;EZH2;FANCI;FEN1;GGH;GINS1;GPR19;GPSM2;GTSE1;H2AFZ;HJURP;HMGA1;HMGB2;HMMR;HPRT1;IMPA2;IRAK1;KIAA0101;KIF11;KIF14;KIF15;KIF18…
ZWINT	11130	0.646	0.823	ZW10 interactor	11130	APOBEC3B;ASPM;AURKA;AURKB;BIRC5;BLM;BUB1B;CCNA2;CCNB1;CCNB2;CCNE2;CCT5;CDC2;CDC20;CDC25A;CDC45L;CDC6;CDC7;CDCA3;CDCA8;CDKN3;CDT1;CENPA;CENPE;CENPF;CENPN;CEP55;CHEK1;CKS1B;CKS2;CSE1L;CTPS;CTSL2;DBF4;DLGAP5;DNAJC9;DTL;E2F1;ERCC6L;ESPL1;EXO1;EZH2;FANCI;FEN1;GGH;GINS1;GPR19;GPSM2;GTSE1;H2AFZ;HJURP;HMGB2;HMMR;KIAA0101;KIF11;KIF14;KIF15;KIF18A;KIF18B;KIF20A;KIF23;KIF2C;KIF4A;KIFC1;KNTC1;KPNA2;MAD2L1;MC…
TPX2	22974	0.642	1.035	TPX2, microtubule-associated, homolog (Xenopus laevis)	22974	AMD1;ANP32E;APOBEC3B;ASPM;AURKA;AURKB;BIRC5;BLM;BUB1B;CCNA2;CCNB1;CCNB2;CCNE2;CCT5;CDC2;CDC20;CDC25A;CDC45L;CDC6;CDC7;CDCA3;CDCA8;CDKN3;CDT1;CEBPG;CENPA;CENPE;CENPF;CENPN;CEP55;CHAF1B;CHEK1;CKS1B;CKS2;CSE1L;CTPS;CTSL2;CXCL10;CYCS;DBF4;DKC1;DLGAP5;DNAJC9;DTL;E2F1;ERCC6L;ESPL1;EXO1;EZH2;FANCI;FEN1;GGH;GINS1;GPR19;GPSM2;GTSE1;H2AFZ;HJURP;HMGA1;HMGB2;HMMR;HPRT1;IMPA2;IRAK1;KIAA0101;KIF11;KIF14;KIF18A…
CENPF	1063	0.639	0.799	centromere protein F, 350/400ka (mitosin)	1063	ANP32E;APOBEC3B;ASPM;AURKA;AURKB;BIRC5;BLM;BUB1B;CCNA2;CCNB1;CCNB2;CCNE2;CCT5;CDC2;CDC20;CDC25A;CDC45L;CDC6;CDC7;CDCA3;CDCA8;CDKN3;CDT1;CENPA;CENPE;CEP55;CHEK1;CKS1B;CKS2;CSE1L;CTPS;CTSL2;DBF4;DEK;DLGAP5;DNAJC9;DNMT1;DTL;E2F1;ERCC6L;ESPL1;EXO1;EZH2;FANCI;FEN1;GGH;GINS1;GPR19;GPSM2;GTSE1;HJURP;HMGB2;HMMR;KIAA0101;KIF11;KIF14;KIF15;KIF18A;KIF18B;KIF20A;KIF23;KIF2C;KIF4A;KIFC1;KNTC1;KPNA2;MAD2L1;MCM…
CDC20	991	0.638	1.255	cell division cycle 20 homolog (S. cerevisiae)	991	AMD1;ANP32E;APOBEC3B;ASPM;AURKA;AURKB;BIRC5;BLM;BUB1B;CCNA2;CCNB1;CCNB2;CCNE2;CCT5;CCT6A;CDC2;CDC25A;CDC45L;CDC6;CDC7;CDCA3;CDCA8;CDKN3;CDT1;CEBPG;CENPA;CENPE;CENPF;CENPN;CEP55;CHAF1B;CHEK1;CKS1B;CKS2;CSE1L;CTPS;CTSL2;CXCL10;CYCS;DBF4;DEK;DLGAP5;DNAJC9;DNMT1;E2F1;ERCC6L;ESPL1;EXO1;EZH2;FANCI;FEN1;GGH;GINS1;GPR19;GPSM2;GTSE1;H2AFZ;HJURP;HMGA1;HMGB2;HMMR;IMPA2;IRAK1;KIAA0101;KIF11;KIF14;KIF18B;KIF2…
KIF14	9928	0.638	0.901	kinesin family member 14	9928	AMD1;ANP32E;APOBEC3B;ASPM;AURKA;AURKB;BIRC5;BLM;BUB1B;CCNA2;CCNB1;CCNB2;CCNE2;CCT5;CDC2;CDC20;CDC25A;CDC45L;CDC6;CDC7;CDCA3;CDCA8;CDKN3;CDT1;CENPA;CENPE;CENPF;CENPN;CEP55;CHEK1;CKS1B;CKS2;CSE1L;CTPS;CTSL2;DBF4;DEK;DLGAP5;DNAJC9;DTL;E2F1;ERCC6L;ESPL1;EXO1;EZH2;FANCI;FEN1;GGH;GINS1;GPR19;GPSM2;GTSE1;H2AFZ;HJURP;HMGA1;HMGB2;HMMR;IMPA2;KIAA0101;KIF11;KIF15;KIF18A;KIF18B;KIF20A;KIF23;KIF2C;KIF4A;KIFC1…
BUB1B	701	0.637	0.777	budding uninhibited by benzimidazoles 1 homolog beta (yeast)	701	ANP32E;APOBEC3B;ASPM;AURKA;AURKB;BIRC5;BLM;CCNA2;CCNB1;CCNB2;CCNE2;CCT5;CDC2;CDC20;CDC25A;CDC45L;CDC6;CDC7;CDCA3;CDCA8;CDKN3;CDT1;CENPA;CENPE;CENPF;CEP55;CHEK1;CKS1B;CKS2;CSE1L;CTPS;CTSL2;DBF4;DLGAP5;DNAJC9;E2F1;ESPL1;EXO1;EZH2;FANCI;FEN1;GGH;GINS1;GPR19;GPSM2;GTSE1;HJURP;HMGA1;HMGB2;HMMR;KIAA0101;KIF11;KIF14;KIF15;KIF18B;KIF20A;KIF23;KIF2C;KIF4A;KIFC1;KNTC1;KPNA2;MAD2L1;MCM10;MCM2;MCM3;MCM6;MELK…
EZH2	2146	0.632	1.011	enhancer of zeste homolog 2 (Drosophila)	2146	ACTL6A;AMD1;ANP32E;APOBEC3B;ASPM;AURKA;AURKB;BIRC5;BLM;BUB1B;CCNA2;CCNB2;CCNE2;CCT5;CCT6A;CDC2;CDC20;CDC25A;CDC45L;CDC6;CDC7;CDCA3;CDCA8;CDKN3;CDT1;CEBPG;CENPA;CENPE;CENPF;CEP55;CHEK1;CKS1B;CKS2;CSE1L;CTPS;CTSL2;DBF4;DEK;DLGAP5;DNAJC9;DNMT1;DTL;E2F1;ESPL1;EXO1;FANCI;FEN1;GGH;GINS1;GPR19;GPSM2;GTSE1;H2AFZ;HDAC2;HJURP;HMGA1;HMGB2;HMMR;IRAK1;KIAA0101;KIF11;KIF14;KIF15;KIF18B;KIF20A;KIF23;KIF2C;KIF4A…
NDC80	10403	0.631	1.349	NDC80 homolog, kinetochore complex component (S. cerevisiae)	10403	AMD1;ANP32E;APOBEC3B;ASPM;AURKA;AURKB;BIRC5;BLM;BUB1B;CCNA2;CCNB1;CCNB2;CCNE2;CCT5;CCT6A;CDC2;CDC20;CDC25A;CDC45L;CDC6;CDC7;CDCA3;CDCA8;CDKN3;CEBPG;CENPA;CENPE;CENPF;CEP55;CHAF1B;CHEK1;CKS1B;CKS2;COQ2;CSE1L;CTPS;CTSL2;CXCL10;CYCS;DBF4;DEK;DLGAP5;DNAJC9;DNMT1;E2F1;ERCC6L;ESPL1;EXO1;EZH2;FANCI;FEN1;GGH;GINS1;GPR19;GPSM2;GTSE1;H2AFZ;HJURP;HMGA1;HMGB2;HMMR;HPRT1;IMPA2;IRAK1;KIAA0101;KIF11;KIF14;KIF18…
TRIP13	9319	0.63	0.897	thyroid hormone receptor interactor 13	9319	AMD1;ANP32E;APOBEC3B;ASPM;AURKA;AURKB;BIRC5;BLM;BUB1B;CCNA2;CCNB1;CCNB2;CCNE2;CCT5;CCT6A;CDC2;CDC20;CDC25A;CDC45L;CDC6;CDC7;CDCA3;CDCA8;CDKN3;CDT1;CEBPG;CENPA;CENPE;CENPF;CEP55;CHEK1;CKS1B;CKS2;CSE1L;CTPS;CTSL2;CXCL10;CYCS;DBF4;DKC1;DLGAP5;DNAJC9;DNMT1;E2F1;ESPL1;EXO1;EZH2;FANCI;FEN1;GGH;GINS1;GPR19;GPSM2;GTSE1;HJURP;HMGA1;HMGB2;HMMR;HPRT1;IRAK1;KIAA0101;KIF11;KIF14;KIF15;KIF18B;KIF20A;KIF23;KIF2…
KIF11	3832	0.625	0.942	kinesin family member 11	3832	APOBEC3B;ASPM;AURKA;AURKB;BIRC5;BLM;BUB1B;CCNA2;CCNB2;CCNE2;CCT5;CDC2;CDC20;CDC25A;CDC45L;CDC6;CDC7;CDCA3;CDCA8;CDKN3;CDT1;CENPA;CENPE;CENPF;CEP55;CHEK1;CKS1B;CKS2;CSE1L;CTPS;CTSL2;CYCS;DBF4;DEK;DLGAP5;DNAJC9;DNMT1;E2F1;ESPL1;EXO1;EZH2;FANCI;FEN1;GGH;GINS1;GPR19;GPSM2;GTSE1;HJURP;HMGA1;HMGB2;HMMR;KIAA0101;KIF14;KIF18B;KIF20A;KIF23;KIF2C;KIFC1;KNTC1;KPNA2;MAD2L1;MCM10;MCM2;MCM3;MCM6;MELK;MKI67;MLF…
BIRC5	332	0.623	1.214	baculoviral IAP repeat-containing 5	332	AMD1;ANP32E;APOBEC3B;ASPM;AURKA;AURKB;BLM;BUB1B;CCNA2;CCNB1;CCNB2;CCNE2;CCT5;CDC2;CDC20;CDC25A;CDC45L;CDC6;CDC7;CDCA3;CDCA8;CDKN3;CDT1;CEBPG;CENPA;CENPE;CENPF;CENPN;CEP55;CHAF1B;CHEK1;CKS1B;CKS2;COQ2;CSE1L;CTPS;CTSL2;CXCL10;CYCS;DBF4;DKC1;DLGAP5;DNAJC9;DTL;E2F1;ERCC6L;ESPL1;EXO1;EZH2;FANCI;FEN1;GGH;GINS1;GPR19;GPSM2;GTSE1;H2AFZ;HJURP;HMGA1;HMGB2;HMMR;HPRT1;IMPA2;IRAK1;KIAA0101;KIF11;KIF14;KIF15;K…
MCM2	4171	0.622	0.847	minichromosome maintenance complex component 2	4171	AMD1;ANP32E;APOBEC3B;AURKA;AURKB;BIRC5;BLM;BUB1B;CCNA2;CCNB2;CCNE2;CCT5;CDC2;CDC20;CDC25A;CDC45L;CDC6;CDC7;CDCA3;CDCA8;CDKN3;CDT1;CENPA;CENPE;CENPF;CHAF1B;CHEK1;CKS1B;CKS2;CTPS;CTSL2;CXCL10;DBF4;DEK;DLGAP5;DNAJC9;DNMT1;E2F1;ESPL1;EXO1;EZH2;FANCI;FEN1;GGH;GINS1;GPR19;GPSM2;GTSE1;H2AFZ;HJURP;HMGA1;HMGB2;HMMR;HPRT1;IMPA2;IRAK1;KIAA0101;KIF11;KIF14;KIF18B;KIF23;KIF2C;KIF4A;KIFC1;KNTC1;KPNA2;MAD2L1;MC…
RRM2	6241	0.617	1.087	ribonucleotide reductase M2 polypeptide	6241	APOBEC3B;ASPM;AURKA;AURKB;BIRC5;BLM;BUB1B;CCNA2;CCNB1;CCNB2;CCNE2;CCT5;CCT6A;CDC2;CDC20;CDC25A;CDC45L;CDC6;CDCA3;CDCA8;CDKN3;CDT1;CEBPG;CENPA;CENPE;CENPF;CENPN;CEP55;CHAF1B;CHEK1;CKS1B;CKS2;COQ2;CSE1L;CTPS;CTSL2;CXCL10;CYCS;DBF4;DLGAP5;DNAJC9;DTL;E2F1;ERCC6L;ESPL1;EXO1;EZH2;FANCI;FEN1;GGH;GINS1;GPR19;GPSM2;GTSE1;H2AFZ;HJURP;HMGA1;HMGB2;HMMR;KIAA0101;KIF11;KIF14;KIF18A;KIF18B;KIF20A;KIF23;KIF2C;KI…
RFC4	5984	0.612	0.634	replication factor C (activator 1) 4, 37kDa	5984	ACTL6A;AMD1;ANP32E;APOBEC3B;ASPM;AURKA;AURKB;BIRC5;BLM;BUB1B;CCNA2;CCNB2;CCNE2;CCT5;CDC2;CDC20;CDC25A;CDC45L;CDC6;CDC7;CDCA3;CDCA8;CDKN3;CEBPG;CENPA;CENPE;CENPF;CENPN;CEP55;CHEK1;CKS1B;CKS2;CSE1L;CTPS;CTSL2;DBF4;DEK;DKC1;DLGAP5;DNAJC9;DNMT1;E2F1;ESPL1;EXO1;EZH2;FANCI;FEN1;GGH;GINS1;GPR19;GPSM2;GTSE1;H2AFZ;HDAC2;HJURP;HMGB2;HMMR;IMPA2;IRAK1;KIAA0101;KIF11;KIF14;KIF15;KIF18B;KIF23;KIF2C;KIF4A;KNTC1…
CKS2	1164	0.61	1.019	CDC28 protein kinase regulatory subunit 2	1164	ACTL6A;APOBEC3B;ASPM;AURKA;AURKB;BIRC5;BUB1B;CCNA2;CCNB1;CCNB2;CCNE2;CCT5;CCT6A;CDC2;CDC20;CDC25A;CDC45L;CDC6;CDCA3;CDCA8;CDKN3;CEBPG;CENPA;CENPE;CENPF;CENPN;CEP55;CHEK1;CKS1B;COQ2;CSE1L;CTPS;CXCL10;CYCS;DBF4;DLGAP5;DNAJC9;DTL;E2F1;ERCC6L;ESPL1;EXO1;EZH2;FANCI;FEN1;GGH;GINS1;GPR19;GPSM2;GTSE1;H2AFZ;HJURP;HMGB2;HMMR;HPRT1;IRAK1;KIAA0101;KIF11;KIF14;KIF18B;KIF20A;KIF23;KIF2C;KIFC1;KPNA2;MAD2L1;MCM2…
KIAA0101	9768	0.61	0.912	KIAA0101	9768	APOBEC3B;ASPM;AURKA;AURKB;BIRC5;BLM;BUB1B;CCNA2;CCNB1;CCNB2;CCNE2;CCT5;CDC2;CDC20;CDC25A;CDC45L;CDC6;CDC7;CDCA3;CDCA8;CDKN3;CENPA;CENPE;CENPF;CENPN;CEP55;CHAF1B;CHEK1;CKS1B;CKS2;CSE1L;CTPS;CYCS;DBF4;DLGAP5;DNAJC9;DTL;E2F1;ERCC6L;ESPL1;EXO1;EZH2;FANCI;FEN1;GINS1;GPR19;GPSM2;GTSE1;H2AFZ;HJURP;HMGB2;HMMR;HPRT1;KIF11;KIF14;KIF18B;KIF20A;KIF23;KIF2C;KIF4A;KIFC1;KNTC1;KPNA2;MAD2L1;MCM2;MCM6;MELK;MKI67;…
NEK2	4751	0.607	0.975	NIMA (never in mitosis gene a)-related kinase 2	4751	ACTL6A;ANP32E;APOBEC3B;ASPM;AURKA;AURKB;BIRC5;BLM;BUB1B;CCNA2;CCNB1;CCNB2;CCNE2;CCT5;CDC2;CDC20;CDC45L;CDC6;CDC7;CDCA3;CDCA8;CDKN3;CDT1;CENPA;CENPE;CENPF;CENPN;CEP55;CHAF1B;CHEK1;CKS1B;CKS2;CSE1L;CTPS;CTSL2;DBF4;DLGAP5;DNAJC9;DTL;E2F1;ERCC6L;ESPL1;EXO1;EZH2;FANCI;FEN1;GGH;GINS1;GPR19;GPSM2;GTSE1;H2AFZ;HJURP;HMGA1;HMGB2;HMMR;HPRT1;KIAA0101;KIF11;KIF14;KIF15;KIF18A;KIF18B;KIF20A;KIF23;KIF2C;KIF4A;K…
HMGB2	3148	0.606	0.723	high-mobility group box 2	3148	ANP32E;APOBEC3B;ASPM;AURKA;BIRC5;BUB1B;CBX3;CCNA2;CCNB1;CCNB2;CCNE2;CCT5;CCT6A;CDC2;CDC20;CDC45L;CDC7;CDCA3;CDCA8;CDKN3;CENPA;CENPE;CENPF;CENPN;CEP55;CHEK1;CKS1B;CKS2;COQ2;DBF4;DEK;DLGAP5;DNAJC9;DTL;ERCC6L;ESPL1;EXO1;EZH2;FANCI;FEN1;GGH;GINS1;GPSM2;GTSE1;H2AFZ;HJURP;HMMR;HPRT1;KIAA0101;KIF11;KIF14;KIF18B;KIF23;KIF2C;KNTC1;KPNA2;MAD2L1;MCM2;MCM3;MCM6;MELK;MKI67;MLF1IP;MTHFD2;NCAPG;NCAPH;NDC80;NEK2…
TOP2A	7153	0.603	1.251	topoisomerase (DNA) II alpha 170kDa	7153	ANP32E;APOBEC3B;ASPM;AURKA;AURKB;BIRC5;BLM;BUB1B;CCNA2;CCNB1;CCNB2;CCNE2;CCT5;CCT6A;CDC2;CDC20;CDC25A;CDC45L;CDC6;CDC7;CDCA3;CDCA8;CDKN3;CENPA;CENPE;CENPF;CEP55;CHEK1;CKS1B;CKS2;CSE1L;CTPS;DBF4;DLGAP5;DNAJC9;DTL;E2F1;ERCC6L;ESPL1;EXO1;EZH2;FANCI;FEN1;GGH;GINS1;GPR19;GPSM2;GTSE1;H2AFZ;HJURP;HMGB2;HMMR;HPRT1;KIAA0101;KIF11;KIF14;KIF18B;KIF20A;KIF23;KIF2C;KIF4A;KIFC1;KNTC1;KPNA2;MAD2L1;MCM2;MCM3;MCM…
CHEK1	1111	0.601	0.841	CHK1 checkpoint homolog (S. pombe)	1111	AMD1;ANP32E;APOBEC3B;ASPM;AURKA;AURKB;BIRC5;BLM;BUB1B;CCNA2;CCNB1;CCNB2;CCNE2;CCT5;CDC2;CDC20;CDC25A;CDC45L;CDC6;CDC7;CDCA3;CDCA8;CDKN3;CDT1;CEBPG;CENPA;CENPE;CENPF;CENPN;CEP55;CHAF1B;CKS1B;CKS2;CTPS;CTSL2;CXCL10;DBF4;DEK;DKC1;DLGAP5;DNAJC9;E2F1;ESPL1;EXO1;EZH2;FANCI;FEN1;GGH;GINS1;GPR19;GPSM2;GTSE1;H2AFZ;HJURP;HMGB2;HMMR;IMPA2;IRAK1;KIAA0101;KIF11;KIF14;KIF18B;KIF23;KIF2C;KIFC1;KPNA2;LAPTM4B;MAD…
KIF2C	11004	0.599	0.681	kinesin family member 2C	11004	AMD1;ANP32E;APOBEC3B;ASPM;AURKA;AURKB;BIRC5;BLM;BUB1B;CCNA2;CCNB2;CCNE2;CCT5;CDC2;CDC20;CDC25A;CDC45L;CDC6;CDC7;CDCA3;CDCA8;CDKN3;CDT1;CENPA;CENPE;CENPF;CEP55;CHEK1;CKS1B;CKS2;CSE1L;CTPS;CTSL2;CXCL10;DBF4;DLGAP5;DNAJC9;E2F1;ESPL1;EXO1;EZH2;FANCI;FEN1;GGH;GINS1;GPR19;GPSM2;GTSE1;HJURP;HMGA1;HMGB2;HMMR;IMPA2;IRAK1;KIAA0101;KIF11;KIF14;KIF18B;KIF20A;KIF23;KIF4A;KIFC1;KNTC1;KPNA2;MAD2L1;MCM10;MCM2;MC…
AURKA	6790	0.598	0.823	aurora kinase A	6790	ACTL6A;ANP32E;APOBEC3B;ASPM;AURKB;BIRC5;BLM;BUB1B;CCNA2;CCNB1;CCNB2;CCNE2;CCT5;CCT6A;CDC2;CDC20;CDC25A;CDC45L;CDC6;CDC7;CDCA3;CDCA8;CDKN3;CDT1;CENPA;CENPE;CENPF;CENPN;CEP55;CHEK1;CKS1B;CKS2;CSE1L;CTPS;CTSL2;CYCS;DBF4;DLGAP5;DNAJC9;DPM1;E2F1;ERCC6L;ESPL1;EXO1;EZH2;FANCI;FEN1;GGH;GINS1;GPR19;GPSM2;GTSE1;H2AFZ;HJURP;HMGB2;HMMR;HPRT1;IRAK1;KIAA0101;KIF11;KIF14;KIF18B;KIF20A;KIF23;KIF2C;KIF4A;KIFC1;KN…
FEN1	2237	0.595	0.563	flap structure-specific endonuclease 1	2237	AMD1;ANP32E;APOBEC3B;ASPM;AURKA;AURKB;BIRC5;BLM;BUB1B;CCNA2;CCNB1;CCNB2;CCNE2;CCT5;CDC2;CDC20;CDC25A;CDC45L;CDC6;CDC7;CDCA3;CDCA8;CDKN3;CDT1;CEBPG;CENPA;CENPE;CENPF;CENPN;CEP55;CHAF1B;CHEK1;CKS1B;CKS2;CSE1L;CTPS;CTSL2;CXCL10;DBF4;DEK;DKC1;DLGAP5;DNAJC9;E2F1;ERCC6L;ESPL1;EXO1;EZH2;FANCI;GGH;GINS1;GPR19;GPSM2;GTSE1;H2AFZ;HJURP;HMGA1;HMGB2;HMMR;HPRT1;IMPA2;IRAK1;KIAA0101;KIF11;KIF14;KIF18B;KIF23;KIF…
HMMR	3161	0.595	0.809	hyaluronan-mediated motility receptor (RHAMM)	3161	APOBEC3B;ASPM;AURKA;AURKB;BIRC5;BLM;BUB1B;CCNA2;CCNB1;CCNB2;CCNE2;CCT5;CDC2;CDC20;CDC25A;CDC45L;CDC6;CDC7;CDCA3;CDCA8;CDKN3;CDT1;CENPA;CENPE;CENPF;CEP55;CHEK1;CKS1B;CKS2;CSE1L;CTPS;CTSL2;CYCS;DBF4;DLGAP5;DNAJC9;E2F1;ESPL1;EXO1;EZH2;FANCI;FEN1;GGH;GINS1;GPR19;GPSM2;GTSE1;H2AFZ;HJURP;HMGB2;HPRT1;KIAA0101;KIF11;KIF14;KIF15;KIF18A;KIF18B;KIF20A;KIF23;KIF2C;KIF4A;KIFC1;KNTC1;KPNA2;MAD2L1;MCM10;MCM2;MC…
FANCI	55215	0.593	0.901	Fanconi anemia, complementation group I	55215	APOBEC3B;ASPM;AURKA;AURKB;BIRC5;BLM;BUB1B;CCNA2;CCNB1;CCNB2;CCNE2;CCT5;CDC2;CDC20;CDC25A;CDC45L;CDC6;CDC7;CDCA3;CDCA8;CDKN3;CENPA;CENPE;CENPF;CENPN;CEP55;CHEK1;CKS1B;CKS2;CSE1L;CTPS;DBF4;DLGAP5;DNAJC9;DTL;E2F1;ERCC6L;ESPL1;EXO1;EZH2;FEN1;GINS1;GPR19;GPSM2;GTSE1;H2AFZ;HJURP;HMGB2;HMMR;KIAA0101;KIF11;KIF14;KIF15;KIF18A;KIF18B;KIF20A;KIF23;KIF2C;KIF4A;KIFC1;KNTC1;KPNA2;MAD2L1;MCM2;MCM3;MCM6;MELK;MKI…
CDKN3	1033	0.592	0.754	cyclin-dependent kinase inhibitor 3	1033	AMD1;APOBEC3B;ASPM;AURKA;AURKB;BIRC5;BLM;BUB1B;CCNA2;CCNB1;CCNB2;CCNE2;CCT5;CDC2;CDC20;CDC25A;CDC45L;CDC6;CDC7;CDCA3;CDCA8;CDT1;CEBPG;CENPA;CENPE;CENPF;CENPN;CEP55;CHAF1B;CHEK1;CKS1B;CKS2;COQ2;CSE1L;CTPS;CTSL2;CXCL10;CYCS;DBF4;DLGAP5;DNAJC9;DTL;E2F1;ERCC6L;ESPL1;EXO1;EZH2;FANCI;FEN1;GGH;GINS1;GPR19;GPSM2;GTSE1;H2AFZ;HJURP;HMGB2;HMMR;IMPA2;IRAK1;KIAA0101;KIF11;KIF14;KIF15;KIF18A;KIF18B;KIF20A;KIF2…
DBF4	10926	0.59	0.88	DBF4 homolog (S. cerevisiae)	10926	ACTL6A;AMD1;ANP32E;APOBEC3B;ASPM;AURKA;BIRC5;BUB1B;CBX3;CCNA2;CCNB1;CCNB2;CCT5;CCT6A;CDC2;CDC20;CDC45L;CDCA3;CDCA8;CDKN3;CEBPG;CENPA;CENPE;CENPF;CENPN;CEP55;CHEK1;CKS1B;CKS2;CTPS;CYCS;DEK;DKC1;DLGAP5;DNAJC9;DTL;ERCC6L;EXO1;EZH2;FANCI;FEN1;GGH;GINS1;GPSM2;GTSE1;H2AFZ;HDAC2;HMGB2;HMMR;HPRT1;IMPA2;KIAA0101;KIF11;KIF14;KIF18A;KIF23;KIF2C;KPNA2;MAD2L1;MCM2;MCM6;MCM7;MELK;MLF1IP;MTHFD2;MYBL2;NAE1;NCAPG…
KPNA2	3838	0.588	0.694	karyopherin alpha 2 (RAG cohort 1, importin alpha 1)	3838	ACTL6A;AMD1;ANP32E;APOBEC3B;ASPM;AURKA;AURKB;BIRC5;BLM;BUB1B;CCNA2;CCNB1;CCNB2;CCNE2;CCT5;CCT6A;CDC2;CDC20;CDC25A;CDC45L;CDC6;CDC7;CDCA3;CDCA8;CDKN3;CEBPG;CENPA;CENPE;CENPF;CENPN;CEP55;CHAF1B;CHEK1;CKS1B;CKS2;COQ2;CTPS;CTSL2;CXCL10;CYCS;DBF4;DEK;DKC1;DLGAP5;DNAJC9;DNMT1;E2F1;ERCC6L;ESPL1;EXO1;EZH2;FANCI;FEN1;GGH;GINS1;GPSM2;GTSE1;H2AFZ;HJURP;HMGA1;HMGB2;HMMR;HPRT1;KIAA0101;KIF11;KIF14;KIF18A;KIF1…
NCAPH	23397	0.587	1.499	non-SMC condensin I complex, subunit H	23397	ANP32E;APOBEC3B;ASPM;AURKA;AURKB;BIRC5;BLM;BUB1B;CCNA2;CCNB2;CCNE2;CCT5;CDC2;CDC20;CDC25A;CDC45L;CDC6;CDC7;CDCA3;CDCA8;CDKN3;CDT1;CENPA;CENPE;CENPF;CEP55;CHEK1;CKS2;CTPS;CTSL2;DBF4;DLGAP5;DNAJC9;DNMT1;E2F1;ESPL1;EXO1;EZH2;FANCI;FEN1;GGH;GINS1;GPR19;GPSM2;GTSE1;HJURP;HMGA1;HMGB2;HMMR;KIAA0101;KIF11;KIF14;KIF18B;KIF20A;KIF23;KIF2C;KIF4A;KIFC1;KPNA2;MAD2L1;MCM10;MCM2;MCM3;MCM6;MELK;MKI67;MYBL2;NDC80…
CENPE	1062	0.586	1.543	centromere protein E, 312kDa	1062	AMD1;ANP32E;APOBEC3B;ASPM;AURKA;AURKB;BIRC5;BLM;BUB1B;CCNA2;CCNB1;CCNB2;CCNE2;CCT5;CCT6A;CDC2;CDC20;CDC25A;CDC45L;CDC6;CDC7;CDCA3;CDCA8;CDKN3;CENPA;CENPF;CENPN;CEP55;CHAF1B;CHEK1;CKS1B;CKS2;COQ2;CSE1L;CTPS;CTSL2;CYCS;DBF4;DKC1;DLGAP5;DNAJC9;DTL;E2F1;ERCC6L;ESPL1;EXO1;EZH2;FANCI;FEN1;GGH;GINS1;GPR19;GPSM2;GTSE1;H2AFZ;HJURP;HMGB2;HMMR;KIAA0101;KIF11;KIF14;KIF15;KIF18A;KIF18B;KIF20A;KIF23;KIF2C;KIF4…
STIL	6491	0.573	0.624	SCL/TAL1 interrupting locus	6491	ACTL6A;AMD1;ANP32E;APOBEC3B;AURKA;AURKB;BIRC5;BLM;BUB1B;CCNA2;CCNB2;CCNE2;CDC2;CDC20;CDC25A;CDC45L;CDC6;CDC7;CDKN3;CDT1;CENPA;CENPE;CENPF;CHEK1;CKS2;CTPS;CTSL2;DBF4;DLGAP5;DNAJC9;E2F1;ESPL1;EXO1;EZH2;FANCI;FEN1;GGH;GINS1;GPR19;GTSE1;HMGB2;HMMR;KIAA0101;KIF11;KIF14;KIF18B;KIF23;KIF2C;KIFC1;KPNA2;MAD2L1;MCM2;MCM3;MCM6;MELK;MKI67;MTHFD2;MYBL2;NCAPD2;NCAPH;NDC80;NEK2;NUP205;PHGDH;PLK1;PLK4;POLE2;PSRC…
SMC4	10051	0.57	0.689	structural maintenance of chromosomes 4	10051	AMD1;ANP32E;APOBEC3B;ASPM;AURKA;AURKB;BIRC5;BLM;BUB1B;CBX3;CCNA2;CCNB2;CCNE2;CCT5;CDC2;CDC20;CDC45L;CDC6;CDC7;CDCA3;CDCA8;CDKN3;CENPA;CENPE;CENPF;CEP55;CHEK1;CKS1B;CKS2;CTPS;CTSL2;CYCS;DBF4;DEK;DLGAP5;DNAJC9;ERCC6L;ESPL1;EXO1;EZH2;FANCI;FEN1;GINS1;GPSM2;GTSE1;H2AFZ;HJURP;HMGB2;HMMR;HPRT1;KIAA0101;KIF11;KIF14;KIF15;KIF18A;KIF18B;KIF23;KIF2C;KIF4A;KNTC1;KPNA2;MAD2L1;MCM2;MCM3;MCM6;MCM7;MELK;MKI67;M…
MCM3	4172	0.561	0.557	minichromosome maintenance complex component 3	4172	AMD1;AURKA;AURKB;BIRC5;BLM;BUB1B;CCNA2;CCNB2;CCNE2;CCT5;CDC2;CDC20;CDC25A;CDC45L;CDC6;CDC7;CDKN3;CDT1;CENPA;CENPE;CENPF;CHEK1;CKS1B;CKS2;CTPS;CTSL2;DEK;DLGAP5;DNAJC9;DNMT1;E2F1;ESPL1;EXO1;EZH2;FANCI;FEN1;GINS1;GPSM2;GTSE1;HJURP;HMGA1;HMGB2;HMMR;IMPA2;KIF11;KIF14;KIF18B;KIF2C;KIFC1;KNTC1;KPNA2;MAD2L1;MCM2;MCM6;MCM7;MELK;MKI67;MSH2;MYBL2;NCAPD2;NCAPH;NDC80;NEK2;NUP153;NUP205;PHGDH;PLK1;POLE2;PSRC1;…
MKI67	4288	0.561	0.727	antigen identified by monoclonal antibody Ki-67	4288	APOBEC3B;ASPM;AURKA;AURKB;BIRC5;BLM;BUB1B;CCNA2;CCNB2;CCNE2;CDC2;CDC20;CDC25A;CDC45L;CDC6;CDC7;CDCA3;CDKN3;CDT1;CENPA;CENPE;CENPF;CEP55;CHEK1;CKS2;CTPS;CTSL2;DLGAP5;DNAJC9;E2F1;ESPL1;EXO1;EZH2;FANCI;FEN1;GGH;GINS1;GPR19;GPSM2;GTSE1;HJURP;HMGA1;HMGB2;HMMR;KIAA0101;KIF11;KIF14;KIF15;KIF18B;KIF20A;KIF23;KIF2C;KIF4A;KIFC1;KNTC1;KPNA2;MAD2L1;MCM10;MCM2;MCM3;MCM6;MCM7;MELK;MYBL2;NCAPD2;NCAPH;NDC80;NEK2…
EXO1	9156	0.56	1.051	exonuclease 1	9156	AMD1;APOBEC3B;ASPM;AURKA;AURKB;BIRC5;BLM;BUB1B;CCNA2;CCNB2;CCNE2;CCT5;CDC2;CDC20;CDC25A;CDC45L;CDC6;CDC7;CDCA3;CDCA8;CDKN3;CDT1;CENPA;CENPE;CENPF;CEP55;CHEK1;CKS1B;CKS2;CSE1L;CTPS;CTSL2;DBF4;DLGAP5;DNAJC9;E2F1;ESPL1;EZH2;FANCI;FEN1;GGH;GINS1;GPR19;GPSM2;GTSE1;HJURP;HMGB2;HMMR;KIAA0101;KIF11;KIF14;KIF18B;KIF20A;KIF23;KIF2C;KIF4A;KIFC1;KNTC1;KPNA2;MAD2L1;MCM2;MCM3;MCM6;MELK;MKI67;MTHFD2;MYBL2;NCAPD…
MYBL2	4605	0.557	1.558	v-myb myeloblastosis viral oncogene homolog (avian)-like 2	4605	AMD1;APOBEC3B;ASPM;AURKA;AURKB;BIRC5;BLM;BUB1B;CCNA2;CCNB2;CCNE2;CCT5;CDC2;CDC20;CDC25A;CDC45L;CDC6;CDC7;CDCA3;CDCA8;CDKN3;CDT1;CENPA;CENPE;CENPF;CEP55;CHEK1;CKS1B;CKS2;CSE1L;CTPS;CTSL2;CXCL10;DBF4;DLGAP5;DNAJC9;E2F1;ESPL1;EXO1;EZH2;FANCI;FEN1;GGH;GINS1;GPR19;GTSE1;HJURP;HMGA1;HMMR;IRAK1;KIAA0101;KIF11;KIF14;KIF20A;KIF23;KIF2C;KIFC1;KPNA2;MAD2L1;MCM10;MCM2;MCM3;MCM6;MCM7;MELK;MKI67;NCAPD2;NCAPH;N…
SPAG5	10615	0.547	0.891	sperm associated antigen 5	10615	APOBEC3B;ASPM;AURKA;AURKB;BIRC5;BLM;BUB1B;CCNA2;CCNB1;CCNB2;CCNE2;CCT5;CDC2;CDC20;CDC25A;CDC45L;CDC6;CDCA3;CDCA8;CDKN3;CDT1;CENPA;CENPE;CENPF;CENPN;CEP55;CHAF1B;CHEK1;CKS1B;CKS2;CSE1L;CTPS;DBF4;DLGAP5;DNAJC9;DTL;E2F1;ERCC6L;ESPL1;EXO1;EZH2;FANCI;FEN1;GGH;GINS1;GPSM2;GTSE1;H2AFZ;HJURP;HMGB2;HMMR;KIAA0101;KIF11;KIF14;KIF18B;KIF20A;KIF23;KIF2C;KIF4A;KIFC1;KNTC1;KPNA2;MAD2L1;MCM2;MCM3;MCM6;MELK;MKI67…
RNASEH2A	10535	0.545	0.568	ribonuclease H2, subunit A	10535	APOBEC3B;AURKA;AURKB;BIRC5;BUB1B;CCNA2;CCNB1;CCNB2;CCNE2;CCT5;CDC2;CDC20;CDC45L;CDC6;CDCA3;CDCA8;CDKN3;CDT1;CENPA;CENPE;CENPF;CENPN;CEP55;CHAF1B;CHEK1;CKS1B;CKS2;CTPS;DBF4;DLGAP5;DNAJC9;DNMT1;DTL;E2F1;ESPL1;EXO1;EZH2;FANCI;FEN1;GGH;GINS1;GPSM2;GTSE1;H2AFZ;HJURP;HMGB2;HMMR;IMPA2;KIAA0101;KIF11;KIF14;KIF18B;KIF23;KIF2C;KIF4A;KIFC1;KPNA2;MAD2L1;MCM2;MCM3;MCM6;MCM7;MELK;MKI67;MYBL2;NCAPD2;NCAPG;NCAPH…
NDUFA9	4704	0.543	0.421	NADH dehydrogenase (ubiquinone) 1 alpha subcomplex, 9, 39kDa	4704	CCNB2;CCT5;CDC20;CEBPG;CENPA;CKS1B;CKS2;EMG1;GINS1;MCM6;MELK;MTHFD2;NCAPD2;PSMB2;PSMD14;RAD51AP1;RRM2;SNRPG;STRAP;UQCRH
CKS1B	1163	0.541	0.821	CDC28 protein kinase regulatory subunit 1B	1163	AMD1;ANP32E;APOBEC3B;ASPM;AURKA;AURKB;BIRC5;BUB1B;CBX3;CCNA2;CCNB1;CCNB2;CCT5;CCT6A;CDC2;CDC20;CDC45L;CDCA3;CDCA8;CDKN3;CEBPG;CENPA;CENPE;CENPF;CENPN;CEP55;CHAF1B;CHEK1;CKS2;CTPS;CYCS;DBF4;DEK;DKC1;DLGAP5;DTL;EMG1;ERCC6L;EXO1;EZH2;FANCI;FEN1;GGH;GINS1;GPSM2;GTSE1;H2AFZ;HJURP;HMGB2;HMMR;HPRT1;IMPA2;IRAK1;KIAA0101;KIF11;KIF14;KIF23;KIF2C;KPNA2;LAPTM4B;MAD2L1;MCM2;MCM3;MCM6;MCM7;MELK;MLF1IP;MSH2;MTH…
SMC2	10592	0.538	0.57	structural maintenance of chromosomes 2	10592	ASPM;AURKA;BIRC5;BUB1B;CCNA2;CCNB2;CCNE2;CDC2;CDC20;CDC7;CDKN3;CENPA;CENPE;CENPF;CHEK1;CKS1B;CKS2;CTSL2;DBF4;DEK;DLGAP5;DNAJC9;DPM1;EXO1;EZH2;FANCI;FEN1;GINS1;GPSM2;HMGB2;HMMR;KIAA0101;KIF11;KIF14;KIF23;KIF2C;KPNA2;MAD2L1;MCM2;MCM3;MCM6;MELK;MKI67;MSH2;NCAPH;NDC80;NEK2;NUP155;POLE2;PRIM1;RAD51AP1;RFC3;RFC4;RRM2;SMC4;SPC25;TOP2A;TPX2;TRIP13;TTK;UBE2C;WDHD1;ZWINT
KIF23	9493	0.533	1.275	kinesin family member 23	9493	APOBEC3B;ASPM;AURKA;AURKB;BIRC5;BUB1B;CCNA2;CCNB1;CCNB2;CCNE2;CCT5;CDC2;CDC20;CDC45L;CDC6;CDCA8;CDKN3;CENPA;CENPE;CENPF;CHEK1;CKS1B;CKS2;CTPS;DBF4;DLGAP5;EXO1;EZH2;FANCI;FEN1;GINS1;GPSM2;GTSE1;H2AFZ;HMGB2;HMMR;KIAA0101;KIF11;KIF14;KIF2C;KIFC1;KPNA2;MAD2L1;MCM2;MCM6;MELK;MKI67;MYBL2;NCAPH;NDC80;NEK2;NUP205;PLK1;PLK4;PSMD14;RAD51;RAD51AP1;RFC4;RNASEH2A;RRM2;SMC2;SMC4;SPAG5;SPC25;STIL;TK1;TMPO;TOP2A…
DEK	7913	0.532	0.735	DEK oncogene	7913	AMD1;ANP32E;APOBEC3B;CBX3;CCNA2;CCNB2;CCT6A;CDC2;CDC20;CEBPG;CENPA;CENPF;CHEK1;CKS1B;CTPS;CTSL2;DBF4;DLGAP5;DPM1;EZH2;FEN1;GGH;GINS1;GPSM2;H2AFZ;HDAC2;HMGB2;IMPA2;KIF11;KIF14;KPNA2;MAD2L1;MCM2;MCM3;MCM6;MELK;MSH2;MTHFD2;NAE1;NDC80;NUP153;NUP155;RAD51AP1;RFC3;RFC4;SLBP;SMC2;SMC4;SNRPC;SNRPD1;SRPK1;STMN1;TOPBP1;TTK;UBA2;UBE2V2;UQCRH;VRK1
DNAJC9	23234	0.527	0.487	DnaJ (Hsp40) homolog, subfamily C, member 9	23234	APOBEC3B;AURKA;AURKB;BIRC5;BLM;BUB1B;CCNA2;CCNB2;CCNE2;CCT5;CDC2;CDC20;CDC25A;CDC45L;CDC7;CDKN3;CENPA;CENPE;CENPF;CHEK1;CKS2;CTPS;CTSL2;DBF4;DLGAP5;E2F1;ESPL1;EXO1;EZH2;FANCI;FEN1;GINS1;GTSE1;HMGB2;HMMR;KIAA0101;KIF11;KIF14;KIF2C;KIFC1;KPNA2;MAD2L1;MCM2;MCM3;MCM6;MELK;MKI67;MTHFD2;MYBL2;NCAPH;NDC80;NEK2;NUP205;PLK1;POLE2;PSRC1;RAD51AP1;RFC4;RNASEH2A;RRM2;SMC2;SMC4;SNRPA1;SPAG5;SPC25;SRPK1;STIL;ST…
GGH	8836	0.526	1.141	gamma-glutamyl hydrolase (conjugase, folylpolygammaglutamyl hydrolase)	8836	AMD1;APOBEC3B;AURKA;BIRC5;BUB1B;CCNA2;CCNB2;CCNE2;CCT5;CCT6A;CDC2;CDC20;CDKN3;CENPA;CENPE;CENPF;CHEK1;CKS1B;CKS2;CTPS;DBF4;DEK;DLGAP5;EXO1;EZH2;FEN1;GINS1;GTSE1;HMGB2;HMMR;KIF11;KIF14;KIF2C;KPNA2;LAPTM4B;MAD2L1;MCM2;MCM6;MELK;MKI67;MTHFD2;MYBL2;NCAPH;NDC80;NEK2;NUP205;POLR2K;PSMD14;PTDSS1;RAD51AP1;RFC4;RNASEH2A;RRM2;SNRPD1;SPAG5;STIL;TAF2;TMSB15A;TOP2A;TPX2;TRIP13;TTK;UBE2C;UBE2V2;VRK1;XPOT;ZWINT
CCNE2	9134	0.525	0.85	cyclin E2	9134	APOBEC3B;AURKA;AURKB;BIRC5;BLM;BUB1B;CCNA2;CCNB2;CDC2;CDC20;CDC45L;CDC6;CDC7;CDKN3;CENPA;CENPE;CENPF;CHEK1;CKS2;CTPS;DLGAP5;DNAJC9;E2F1;ESPL1;EXO1;EZH2;FANCI;FEN1;GGH;GINS1;GPR19;GPSM2;GTSE1;HMGB2;HMMR;KIAA0101;KIF11;KIF14;KIF23;KIF2C;KIFC1;KNTC1;KPNA2;MAD2L1;MCM2;MCM3;MCM6;MELK;MKI67;MYBL2;NCAPH;NDC80;NEK2;PLK1;PLK4;POLE2;POLR2K;PRIM1;PTDSS1;PTTG3P;RAD51;RAD51AP1;RFC3;RFC4;RNASEH2A;RRM2;SMC2;SMC…
GTSE1	51512	0.525	0.824	G-2 and S-phase expressed 1	51512	ANP32E;APOBEC3B;ASPM;AURKA;AURKB;BIRC5;BLM;BUB1B;CCNA2;CCNB1;CCNB2;CCNE2;CCT5;CDC2;CDC20;CDC25A;CDC45L;CDC6;CDC7;CDCA3;CDCA8;CDKN3;CDT1;CEBPG;CENPA;CENPE;CENPF;CENPN;CEP55;CHEK1;CKS1B;CKS2;CTPS;CTSL2;DBF4;DKC1;DLGAP5;DNAJC9;DTL;E2F1;ERCC6L;ESPL1;EXO1;EZH2;FANCI;FEN1;GGH;GINS1;GPR19;GPSM2;H2AFZ;HJURP;HMGA1;HMGB2;HMMR;KIAA0101;KIF11;KIF14;KIF15;KIF18A;KIF18B;KIF20A;KIF23;KIF2C;KIF4A;KIFC1;KPNA2;MAD…
ESPL1	9700	0.522	0.759	extra spindle pole bodies homolog 1 (S. cerevisiae)	9700	APOBEC3B;ASPM;AURKA;AURKB;BIRC5;BLM;BUB1B;CCNA2;CCNB1;CCNB2;CCNE2;CDC2;CDC20;CDC25A;CDC45L;CDC6;CDC7;CDCA3;CDCA8;CDKN3;CDT1;CENPA;CENPE;CENPF;CEP55;CHEK1;CKS2;CSE1L;CTPS;DLGAP5;DNAJC9;DNMT1;DTL;E2F1;ERCC6L;EXO1;EZH2;FANCI;FEN1;GINS1;GPSM2;GTSE1;HJURP;HMGB2;HMMR;KIAA0101;KIF11;KIF14;KIF15;KIF18A;KIF18B;KIF20A;KIF2C;KIF4A;KIFC1;KNTC1;KPNA2;MAD2L1;MCM10;MCM2;MCM3;MCM6;MELK;MKI67;MLF1IP;MYBL2;NCAPD2;…
VRK1	7443	0.521	0.629	vaccinia related kinase 1	7443	AURKA;CBX3;CCNB2;CCT5;CCT6A;CDC2;CDC20;CDKN3;CEBPG;CENPA;CENPE;CKS1B;CKS2;CSE1L;DBF4;DEK;DLGAP5;ERCC6L;EZH2;FANCI;FEN1;GGH;GINS1;H2AFZ;HMGB2;KIAA0101;KIF14;MAD2L1;MCM6;MELK;MLF1IP;MTHFD2;NCAPG;NDC80;NUP155;POLR2K;PSMB2;PSMD14;RAD51AP1;RFC4;RRM2;SNRPA1;SNRPD1;SNRPG;TTK;UBE2V2;UQCRH;ZWINT
MTHFD2	10797	0.52	0.678	methylenetetrahydrofolate dehydrogenase (NADP+ dependent) 2, methenyltetrahydrofolate cyclohydrolase	10797	ACTL6A;AMD1;APOBEC3B;AURKA;BIRC5;BUB1B;CCNA2;CCNB2;CCT5;CCT6A;CDC2;CDC20;CDC45L;CDCA8;CDKN3;CEBPG;CENPA;CENPE;CENPF;CENPN;CHEK1;CKS1B;CKS2;CYCS;DBF4;DEK;DKC1;DLGAP5;DNAJC9;EXO1;EZH2;FANCI;FEN1;GGH;GINS1;GTSE1;H2AFZ;HDAC2;HMGB2;HMMR;KIAA0101;KIF11;KIF14;KIF2C;KPNA2;MAD2L1;MCM2;MCM6;MELK;MLF1IP;NCAPG;NDC80;NDUFA9;NEK2;NUP155;NUP205;POLR2K;PSMB2;PSMD14;RAD51AP1;RFC4;RPP40;RRM2;SLC7A5;SMC4;SNRPA1;SNR…
NCAPD2	9918	0.52	0.6	non-SMC condensin I complex, subunit D2	9918	AURKA;AURKB;BIRC5;BLM;BUB1B;CCNA2;CCNB2;CDC2;CDC20;CDC25A;CDC45L;CDC6;CDCA3;CDCA8;CDKN3;CDT1;CEBPG;CENPA;CENPF;CHEK1;CTPS;DLGAP5;EMG1;ESPL1;EXO1;EZH2;FEN1;GINS1;GPR19;GTSE1;KIF14;KIF2C;MAD2L1;MCM2;MCM3;MCM6;MCM7;MELK;MKI67;MYBL2;NDC80;NDUFA9;NEK2;NUP205;PHGDH;PLK1;PTDSS1;RAD51AP1;RAD54L;RFC4;RNASEH2A;SLC7A5;SPAG5;SRPK1;STIL;TMPO;TOP2A;TPX2;TRIP13;TTK;UBE2C;UCK2
CTPS	1503	0.516	0.676	CTP synthase	1503	AMD1;ANP32E;APOBEC3B;ASPM;AURKA;AURKB;BIRC5;BLM;BUB1B;CCNA2;CCNB2;CCNE2;CCT5;CDC2;CDC20;CDC25A;CDC45L;CDC6;CDC7;CDCA3;CDCA8;CDKN3;CDT1;CEBPG;CENPA;CENPE;CENPF;CHEK1;CKS1B;CKS2;CTSL2;DBF4;DEK;DKC1;DLGAP5;DNAJC9;E2F1;ESPL1;EXO1;EZH2;FANCI;FEN1;GGH;GINS1;GPSM2;GTSE1;HJURP;HMGA1;HMMR;IMPA2;IRAK1;KIAA0101;KIF11;KIF14;KIF18B;KIF23;KIF2C;KIFC1;KPNA2;LAPTM4B;MAD2L1;MCM10;MCM2;MCM3;MCM6;MCM7;MELK;MKI67;MS…
APOBEC3B	9582	0.513	1.151	apolipoprotein B mRNA editing enzyme, catalytic polypeptide-like 3B	9582	ANP32E;AURKA;AURKB;BIRC5;BLM;BUB1B;CCNA2;CCNB2;CCNE2;CCT5;CDC2;CDC20;CDC45L;CDC6;CDCA8;CDKN3;CEBPG;CENPA;CENPE;CENPF;CHEK1;CKS1B;CKS2;CTPS;CTSL2;CXCL10;DBF4;DEK;DLGAP5;DNAJC9;E2F1;ESPL1;EXO1;EZH2;FANCI;FEN1;GGH;GINS1;GPR19;GPSM2;GTSE1;HMGB2;HMMR;IRAK1;KIAA0101;KIF11;KIF14;KIF23;KIF2C;KIFC1;KPNA2;MAD2L1;MCM2;MCM6;MELK;MKI67;MTHFD2;MYBL2;NCAPH;NDC80;NEK2;PLK1;PSMB2;RAD51AP1;RFC4;RNASEH2A;RRM2;SLC7A…
NUP205	23165	0.504	0.598	nucleoporin 205kDa	23165	AMD1;AURKA;BIRC5;BUB1B;CCNA2;CCNB2;CCT5;CDC2;CDC20;CDC45L;CDCA8;CDKN3;CEBPG;CENPA;CENPE;CENPF;CHEK1;CKS1B;CKS2;CTPS;DBF4;DKC1;DLGAP5;DNAJC9;EXO1;EZH2;FANCI;FEN1;GGH;GINS1;GTSE1;IMPA2;KIF11;KIF14;KIF23;KIF2C;KPNA2;MAD2L1;MCM2;MCM3;MCM6;MCM7;MELK;MKI67;MTHFD2;MYBL2;NCAPD2;NCAPH;NDC80;NEK2;NUP155;PHGDH;PSMB2;PTDSS1;RAD51AP1;RAD54L;RFC3;RFC4;RRM2;SHFM1;SLC7A5;SMC4;SNRPD1;SPAG5;SRPK1;STIL;TMSB15A;TPX2…
GPSM2	29899	0.503	1.094	G-protein signaling modulator 2 (AGS3-like, C. elegans)	29899	ANP32E;APOBEC3B;ASPM;AURKA;AURKB;BIRC5;BUB1B;CCNA2;CCNB1;CCNB2;CCNE2;CCT5;CDC2;CDC20;CDC45L;CDCA3;CDCA8;CDKN3;CEBPG;CENPA;CENPE;CENPF;CENPN;CEP55;CHAF1B;CHEK1;CKS1B;CKS2;CTPS;DBF4;DEK;DKC1;DLGAP5;DTL;ERCC6L;ESPL1;EXO1;EZH2;FANCI;FEN1;GINS1;GTSE1;H2AFZ;HJURP;HMGB2;HMMR;IMPA2;KIAA0101;KIF11;KIF14;KIF15;KIF18A;KIF18B;KIF20A;KIF23;KIF2C;KIF4A;KPNA2;LAPTM4B;MAD2L1;MCM10;MCM2;MCM3;MCM6;MELK;MKI67;MLF1I…
SNRPD1	6632	0.503	0.549	small nuclear ribonucleoprotein D1 polypeptide 16kDa	6632	AMD1;AURKA;BIRC5;CBX3;CCNB1;CCNB2;CCT5;CCT6A;CDC2;CDC20;CDC45L;CDCA3;CDCA8;CDKN3;CEBPG;CENPA;CENPE;CENPN;CHAF1B;CHEK1;CKS1B;CKS2;CTPS;CYCS;DBF4;DEK;DKC1;DLGAP5;EMG1;ERCC6L;EZH2;FEN1;GGH;GINS1;GPSM2;H2AFZ;HMGB2;HPRT1;IMPA2;KIAA0101;KIF14;KPNA2;LAPTM4B;MAD2L1;MCM2;MCM6;MCM7;MELK;MLF1IP;MTHFD2;NAE1;NCAPG;NDC80;NEK2;NUP155;NUP205;PBK;POLR2K;PRC1;PSMB2;PSMD14;RAD51AP1;RFC3;RFC4;RNASEH2A;RRM2;SLBP;SMC4…
ACTL6A	86	0.501	0.551	actin-like 6A	86	AURKA;CCNB2;CKS2;DBF4;DPM1;EZH2;GINS1;HDAC2;KPNA2;MAD2L1;MCM6;MELK;MTHFD2;NEK2;NUP153;RAD51AP1;RFC4;STIL;TAF11;TAF2;TTK;UBA2;XPOT
CDC45L	8318	0.501	1.727	CDC45 cell division cycle 45-like (S. cerevisiae)	8318	APOBEC3B;AURKA;AURKB;BIRC5;BUB1B;CCNA2;CCNB1;CCNB2;CCNE2;CCT5;CDC2;CDC20;CDC25A;CDC6;CDCA3;CDCA8;CDKN3;CEBPG;CENPA;CENPE;CENPF;CENPN;CHAF1B;CHEK1;CKS1B;CKS2;CTPS;DBF4;DKC1;DLGAP5;DNAJC9;E2F1;ESPL1;EXO1;EZH2;FANCI;FEN1;GINS1;GPSM2;GTSE1;H2AFZ;HJURP;HMGB2;HMMR;IMPA2;KIAA0101;KIF11;KIF14;KIF18B;KIF23;KIF2C;KPNA2;MAD2L1;MCM2;MCM3;MCM6;MCM7;MELK;MKI67;MLF1IP;MTHFD2;MYBL2;NCAPD2;NCAPG;NCAPH;NDC80;NEK2;…
AMD1	262	0.5	0.71	adenosylmethionine decarboxylase 1	262	ANP32E;BIRC5;CCNA2;CCNB2;CCT5;CDC2;CDC20;CDCA8;CDKN3;CEBPG;CENPA;CENPE;CHEK1;CKS1B;CTPS;CTSL2;CYCS;DBF4;DEK;DKC1;DLGAP5;EXO1;EZH2;FEN1;GGH;GINS1;H2AFZ;HDAC2;IMPA2;KIF14;KIF2C;KPNA2;LAPTM4B;MAD2L1;MCM2;MCM3;MCM6;MCM7;MELK;MSH2;MTHFD2;MYBL2;NAE1;NDC80;NUP205;PHGDH;PTDSS1;RAD51AP1;RFC3;RFC4;SLC7A5;SMC4;SNRPC;SNRPD1;SRPK1;STIL;STMN1;TFRC;TMSB15A;TPX2;TRIP13;TTK;UBE2C;UBE2V2;UCK2;UQCRH;XPOT
SPC25	57405	0.497	0.869	SPC25, NDC80 kinetochore complex component, homolog (S. cerevisiae)	57405	APOBEC3B;AURKA;AURKB;BIRC5;BLM;BUB1B;CCNA2;CCNB2;CCNE2;CDC2;CDC20;CDC25A;CDC6;CDC7;CDKN3;CDT1;CENPA;CENPE;CENPF;CHEK1;CKS2;CTPS;CTSL2;DLGAP5;DNAJC9;E2F1;ESPL1;EXO1;EZH2;FANCI;FEN1;GINS1;GTSE1;HMMR;KIAA0101;KIF11;KIF14;KIF23;KIF2C;KIFC1;KPNA2;MAD2L1;MCM2;MCM3;MCM6;MELK;MKI67;MYBL2;NCAPH;NDC80;NEK2;PLK1;PSRC1;PTTG3P;RAD51AP1;RFC4;RNASEH2A;RRM2;SMC2;SMC4;SPAG5;SRPK1;STIL;STMN1;TK1;TMPO;TOP2A;TPX2;TR…
PLK1	5347	0.496	0.947	polo-like kinase 1 (Drosophila)	5347	APOBEC3B;ASPM;AURKA;AURKB;BIRC5;BLM;BUB1B;CCNA2;CCNB2;CCNE2;CCT5;CDC2;CDC20;CDC25A;CDC45L;CDC6;CDC7;CDCA3;CDCA8;CDKN3;CDT1;CENPA;CENPE;CENPF;CEP55;CHEK1;CKS2;CTPS;CTSL2;DLGAP5;DNAJC9;E2F1;ESPL1;EXO1;EZH2;FANCI;FEN1;GINS1;GPR19;GTSE1;HJURP;HMGA1;HMMR;KIAA0101;KIF11;KIF14;KIF18B;KIF20A;KIF23;KIF2C;KIF4A;KIFC1;KPNA2;MAD2L1;MCM10;MCM2;MCM3;MCM6;MELK;MKI67;MYBL2;NCAPD2;NCAPH;NDC80;NEK2;PRC1;PSRC1;PTDS…
POLE2	5427	0.496	0.597	polymerase (DNA directed), epsilon 2 (p59 subunit)	5427	AURKA;BIRC5;BLM;BUB1B;CCNA2;CCNB2;CCNE2;CDC2;CDC20;CDC6;CDC7;CDKN3;CENPA;CENPE;CENPF;CHEK1;CKS2;DLGAP5;DNAJC9;E2F1;ESPL1;EXO1;EZH2;FANCI;FEN1;GINS1;HMGB2;HMMR;KIAA0101;KIF11;KIF14;KIF2C;MAD2L1;MCM2;MCM3;MCM6;MELK;MKI67;NCAPH;NDC80;NEK2;PRIM1;RAD51AP1;RFC4;RNASEH2A;RRM2;SMC2;SPAG5;STIL;TK1;TOP2A;TPX2;TRIP13;TTK;UBE2C;ZWINT
RFC3	5983	0.496	0.624	replication factor C (activator 1) 3, 38kDa	5983	AMD1;CCNA2;CCNB2;CCNE2;CDC2;CDC20;CDKN3;CENPA;CHEK1;CKS1B;CTPS;DBF4;DEK;DLGAP5;FEN1;GINS1;GPSM2;HMMR;IMPA2;KIF11;KIF14;KIF2C;KPNA2;MAD2L1;MCM2;MCM3;MCM6;MCM7;MELK;MSH2;NAE1;NEK2;NUP205;PLK4;RAD51AP1;RFC4;RRM2;SMC2;SMC4;SNRPC;SNRPD1;SRPK1;TMPO;TPX2;TRIP13;TTK;UBE2C;UCK2
AURKB	9212	0.495	1.005	aurora kinase B	9212	APOBEC3B;ASPM;AURKA;BIRC5;BLM;BUB1B;CCNA2;CCNB1;CCNB2;CCNE2;CCT5;CDC2;CDC20;CDC25A;CDC45L;CDC6;CDCA3;CDCA8;CDKN3;CDT1;CEBPG;CENPA;CENPE;CENPF;CEP55;CHAF1B;CHEK1;CKS1B;CKS2;CTPS;CTSL2;DLGAP5;DNAJC9;E2F1;ESPL1;EXO1;EZH2;FANCI;FEN1;GINS1;GPSM2;GTSE1;H2AFZ;HJURP;HMMR;IMPA2;KIAA0101;KIF11;KIF14;KIF18B;KIF20A;KIF23;KIF2C;KIFC1;KPNA2;MAD2L1;MCM10;MCM2;MCM3;MCM6;MCM7;MELK;MKI67;MYBL2;NCAPD2;NCAPG;NCAPH;N…
STMN1	3925	0.494	0.718	stathmin 1/oncoprotein 18	3925	AMD1;ANP32E;APOBEC3B;AURKA;AURKB;BIRC5;BLM;BUB1B;CCNA2;CCNB2;CDC2;CDC20;CDC45L;CDC7;CDCA8;CDKN3;CENPA;CENPE;CENPF;CENPN;CEP55;CHEK1;CKS2;CTPS;DBF4;DEK;DLGAP5;DNAJC9;ESPL1;EXO1;EZH2;FANCI;FEN1;GINS1;GPSM2;GTSE1;H2AFZ;HMGB2;HMMR;KIAA0101;KIF11;KIF14;KIF18B;KIF2C;KPNA2;MAD2L1;MCM2;MCM6;MELK;MKI67;MTHFD2;MYBL2;NCAPG;NCAPH;NDC80;NEK2;PHGDH;PLK1;PRC1;RAD51AP1;RFC4;RNASEH2A;RRM2;SMC4;SPAG5;SPC25;SRPK1;S…
SNRPC	6631	0.492	0.506	small nuclear ribonucleoprotein polypeptide C	6631	AMD1;AURKA;AURKB;BIRC5;BUB1B;CCNA2;CCNB1;CCNB2;CCT5;CDC2;CDC20;CDC45L;CDCA3;CDCA8;CDKN3;CEBPG;CENPA;CENPE;CENPN;CHAF1B;CHEK1;CKS1B;CKS2;CTPS;CXCL10;DBF4;DEK;DKC1;DLGAP5;EXO1;EZH2;FEN1;GINS1;GPSM2;GTSE1;H2AFZ;HMGA1;HMGB2;IMPA2;IRAK1;KIAA0101;KIF14;KIF2C;KPNA2;LAPTM4B;MAD2L1;MCM2;MCM3;MCM6;MCM7;MELK;MSH2;MTHFD2;MYBL2;NAE1;NDC80;NEK2;NUP155;PLK1;POLR2K;PRC1;PSMB2;PSMD14;RAD51AP1;RFC3;RFC4;RNASEH2A;R…
TK1	7083	0.492	0.848	thymidine kinase 1, soluble	7083	APOBEC3B;AURKA;AURKB;BIRC5;BLM;BUB1B;CCNA2;CCNB2;CCNE2;CCT5;CDC2;CDC20;CDC25A;CDC45L;CDC6;CDC7;CDKN3;CDT1;CENPA;CENPE;CENPF;CHEK1;CKS2;CTPS;DLGAP5;DNAJC9;E2F1;ESPL1;EXO1;EZH2;FANCI;FEN1;GINS1;GTSE1;HMMR;KIAA0101;KIF11;KIF14;KIF23;KIF2C;KIFC1;KPNA2;MAD2L1;MCM2;MCM3;MCM6;MELK;MKI67;MYBL2;NCAPH;NDC80;NEK2;PLK1;POLE2;PSRC1;PTTG3P;RAD51;RAD51AP1;RFC4;RNASEH2A;RRM2;SLC7A5;SPAG5;SPC25;STIL;TMSB15A;TOP2A…
CDC7	8317	0.491	0.673	cell division cycle 7 homolog (S. cerevisiae)	8317	AURKA;BIRC5;BLM;BUB1B;CCNA2;CCNB2;CCNE2;CDC2;CDC20;CDC6;CDKN3;CENPA;CENPE;CENPF;CHEK1;CTPS;CTSL2;DLGAP5;DNAJC9;E2F1;ESPL1;EXO1;EZH2;FANCI;FEN1;GINS1;GTSE1;HMGB2;HMMR;KIAA0101;KIF11;KIF14;KIF2C;KNTC1;KPNA2;MAD2L1;MCM2;MCM3;MCM6;MELK;MKI67;MSH2;MYBL2;NCAPH;NDC80;NEK2;NUP153;PLK1;POLE2;PSRC1;PTTG3P;RAD51AP1;RFC4;SMC2;SMC4;SPC25;SRPK1;STIL;STMN1;TK1;TMSB15A;TOP2A;TPX2;TRIP13;TTK;UBE2C;ZWINT
SRPK1	6732	0.491	0.437	SFRS protein kinase 1	6732	AMD1;ANP32E;APOBEC3B;AURKA;AURKB;BIRC5;BLM;BUB1B;CCNA2;CCNB2;CCNE2;CDC2;CDC20;CDC25A;CDC6;CDC7;CDKN3;CDT1;CENPA;CENPE;CENPF;CHEK1;CTPS;CTSL2;DBF4;DEK;DLGAP5;DNAJC9;E2F1;EXO1;EZH2;FEN1;GINS1;GPR19;GTSE1;HMGA1;HMMR;IMPA2;KIF11;KIF14;KIF2C;KPNA2;MAD2L1;MCM2;MCM3;MCM6;MELK;MKI67;MSH2;MTHFD2;MYBL2;NCAPD2;NCAPH;NDC80;NEK2;NUP153;NUP205;PHGDH;PLK1;PSRC1;PTDSS1;RAD51AP1;RFC3;RFC4;RPP40;SLC7A5;SNRPC;SPC25…
ASPM	259266	0.488	1.554	asp (abnormal spindle) homolog, microcephaly associated (Drosophila)	259266	ANP32E;AURKA;AURKB;BIRC5;BUB1B;CCNA2;CCNB1;CCNB2;CDC2;CDC20;CDCA3;CDCA8;CDKN3;CENPA;CENPE;CENPF;CENPN;CEP55;CHEK1;CKS1B;CKS2;CTPS;DBF4;DKC1;DLGAP5;DTL;ERCC6L;ESPL1;EXO1;EZH2;FANCI;FEN1;GINS1;GPSM2;GTSE1;H2AFZ;HJURP;HMGB2;HMMR;KIAA0101;KIF11;KIF14;KIF15;KIF18A;KIF18B;KIF20A;KIF23;KIF2C;KIF4A;KPNA2;MAD2L1;MCM10;MCM6;MELK;MKI67;MLF1IP;MYBL2;NCAPG;NCAPH;NDC80;NEK2;PBK;PLK1;PRC1;RAD51AP1;RFC4;RRM2;SMC…
ANP32E	81611	0.487	0.926	acidic (leucine-rich) nuclear phosphoprotein 32 family, member E	81611	AMD1;APOBEC3B;ASPM;AURKA;BIRC5;BUB1B;CCNA2;CCNB1;CCNB2;CDC2;CDC20;CDCA3;CDCA8;CEBPG;CENPA;CENPE;CENPF;CENPN;CEP55;CHEK1;CKS1B;CTPS;DBF4;DEK;DKC1;DLGAP5;DTL;ERCC6L;EZH2;FEN1;GINS1;GPSM2;GTSE1;H2AFZ;HJURP;HMGB2;HPRT1;KIF14;KIF15;KIF18A;KIF18B;KIF2C;KIF4A;KPNA2;MAD2L1;MCM10;MCM2;MCM6;MELK;NCAPG;NCAPH;NDC80;NEK2;PBK;PRC1;RAD51AP1;RFC4;SMC4;SNRPA1;SRPK1;STIL;STMN1;TACC3;TOP2A;TPX2;TRIP13;TTK;UBE2C;UCK2
BLM	641	0.485	0.627	Bloom syndrome	641	APOBEC3B;AURKA;AURKB;BIRC5;BUB1B;CCNA2;CCNB2;CCNE2;CDC2;CDC20;CDC25A;CDC6;CDC7;CDKN3;CDT1;CENPA;CENPE;CENPF;CHEK1;CTPS;CTSL2;DLGAP5;DNAJC9;E2F1;ESPL1;EXO1;EZH2;FANCI;FEN1;GINS1;GPR19;GTSE1;HMMR;KIAA0101;KIF11;KIF14;KIF18B;KIF2C;KIFC1;KNTC1;KPNA2;MAD2L1;MCM2;MCM3;MCM6;MELK;MKI67;MYBL2;NCAPD2;NCAPH;NDC80;NEK2;PHGDH;PLK1;POLE2;PSRC1;PTDSS1;PTTG3P;RAD51;RAD51AP1;RFC4;RPP40;RRM2;SLC7A5;SMC4;SPAG5;SPC2…
CCT5	22948	0.48	0.655	chaperonin containing TCP1, subunit 5 (epsilon)	22948	AMD1;APOBEC3B;AURKA;AURKB;BIRC5;BUB1B;CCNA2;CCNB1;CCNB2;CCT6A;CDC2;CDC20;CDC45L;CDC6;CDCA3;CDCA8;CDKN3;CEBPG;CENPA;CENPE;CENPF;CENPN;CHAF1B;CHEK1;CKS1B;CKS2;CSE1L;CTPS;CYCS;DBF4;DKC1;DLGAP5;DNAJC9;EXO1;EZH2;FANCI;FEN1;GGH;GINS1;GPSM2;GTSE1;H2AFZ;HMGB2;HMMR;HPRT1;IMPA2;IRAK1;KIAA0101;KIF11;KIF14;KIF23;KIF2C;KPNA2;LAPTM4B;MAD2L1;MCM2;MCM3;MCM6;MELK;MTHFD2;MYBL2;NAE1;NCAPG;NCAPH;NDC80;NDUFA9;NEK2;NU…
CSE1L	1434	0.48	0.544	CSE1 chromosome segregation 1-like (yeast)	1434	AURKA;BIRC5;BUB1B;CCNA2;CCNB2;CCT5;CCT6A;CDC2;CDC20;CDKN3;CENPA;CENPE;CENPF;CKS2;DLGAP5;DPM1;E2F1;ESPL1;EXO1;EZH2;FANCI;FEN1;GINS1;HMMR;KIAA0101;KIF11;KIF14;KIF2C;KNTC1;MAD2L1;MCM6;MELK;MYBL2;NDC80;NEK2;PSMD14;RAD51AP1;RFC4;RRM2;SHFM1;SPAG5;TOP2A;TPX2;TRIP13;TTK;UBE2C;VRK1;ZWINT
GPR19	2842	0.48	1.366	G protein-coupled receptor 19	2842	APOBEC3B;AURKA;BIRC5;BLM;BUB1B;CCNA2;CCNB2;CCNE2;CDC2;CDC20;CDC6;CDKN3;CENPA;CENPE;CENPF;CHEK1;CKS2;DLGAP5;EXO1;EZH2;FANCI;FEN1;GINS1;GTSE1;HMMR;KIAA0101;KIF11;KIF14;KIF2C;MAD2L1;MCM2;MCM6;MELK;MKI67;MYBL2;NCAPD2;NCAPH;NDC80;NEK2;PLK1;RAD51AP1;RFC4;RRM2;SLC7A5;SRPK1;STIL;TMSB15A;TOP2A;TPX2;TRIP13;TTK;UBE2C;ZWINT
PLK4	10733	0.48	0.902	polo-like kinase 4 (Drosophila)	10733	AURKA;AURKB;BIRC5;BUB1B;CCNA2;CCNB2;CCNE2;CDC2;CDC20;CDC6;CDCA8;CDKN3;CENPA;CENPE;CENPF;CHAF1B;CHEK1;CKS1B;CKS2;DBF4;DLGAP5;ESPL1;EXO1;EZH2;FANCI;FEN1;GINS1;GPSM2;GTSE1;HMGB2;HMMR;KIAA0101;KIF11;KIF14;KIF23;KIF2C;KPNA2;MAD2L1;MCM2;MCM6;MELK;MKI67;MYBL2;NCAPH;NDC80;NEK2;PRC1;RAD51AP1;RFC3;RNASEH2A;RRM2;SMC4;SPAG5;STIL;TMPO;TOP2A;TPX2;TRIP13;TTK;UBE2C;ZWINT
TAF2	6873	0.48	0.604	TAF2 RNA polymerase II, TATA box binding protein (TBP)-associated factor, 150kDa	6873	ACTL6A;CCNE2;CENPA;CENPE;CKS2;EZH2;GGH;GINS1;HMGB2;KPNA2;MAD2L1;MELK;MTHFD2;POLR2K;PTDSS1;RAD51AP1;STIL;TOP2A;TOPBP1;TTK;UBA2;UBE2V2;XPOT
TOPBP1	11073	0.48	0.439	topoisomerase (DNA) II binding protein 1	11073	CDC2;CENPF;DBF4;DEK;EZH2;FANCI;GINS1;HMGB2;KNTC1;MAD2L1;MCM2;MCM6;MELK;RAD51AP1;RFC4;SMC4;TAF2;TTK
RAD54L	8438	0.479	1.308	RAD54-like (S. cerevisiae)	8438	AURKA;BIRC5;BUB1B;CCNA2;CCNB2;CDC2;CDC20;CDC25A;CDC45L;CDCA8;CDKN3;CENPA;CENPE;CENPF;CHEK1;CKS1B;CKS2;CTPS;DBF4;DLGAP5;E2F1;EXO1;EZH2;FANCI;FEN1;GINS1;GTSE1;HMGB2;KIF14;KIF2C;MAD2L1;MCM2;MCM3;MCM6;MELK;NCAPD2;NDC80;NUP205;PSMB2;RAD51AP1;RFC4;RNASEH2A;SPAG5;STIL;TPX2;TRIP13;TTK;UBE2C;UQCRH;ZWINT
CEBPG	1054	0.476	0.658	CCAAT/enhancer binding protein (C/EBP), gamma	1054	AMD1;ANP32E;APOBEC3B;AURKB;BIRC5;CCNB1;CCNB2;CCT5;CCT6A;CDC2;CDC20;CDC45L;CDCA8;CDKN3;CENPA;CENPN;CHAF1B;CHEK1;CKS1B;CKS2;COQ2;CTPS;CXCL10;DBF4;DEK;DKC1;DLGAP5;EZH2;FEN1;GINS1;GPSM2;GTSE1;H2AFZ;IMPA2;IRAK1;KPNA2;MAD2L1;MCM6;MELK;MTHFD2;NCAPD2;NDC80;NDUFA9;NUP155;NUP205;PHGDH;POLR2K;PSMB2;PSMD14;RAD51AP1;RFC4;RRM2;SNRPC;SNRPD1;SNRPG;TPX2;TRIP13;TTK;UBA2;UBE2C;UBE2V2;UCK2;UQCRH;VRK1;XPOT
PRC1	9055	0.476	1.156	protein regulator of cytokinesis 1	9055	ANP32E;ASPM;AURKA;AURKB;BIRC5;BUB1B;CCNA2;CCNB1;CCNB2;CCT5;CDC2;CDC20;CDC45L;CDCA3;CDCA8;CDKN3;CENPA;CENPE;CENPF;CENPN;CEP55;CHEK1;CKS1B;CKS2;CTPS;DBF4;DKC1;DLGAP5;DTL;ERCC6L;ESPL1;EXO1;EZH2;FANCI;FEN1;GINS1;GPSM2;GTSE1;H2AFZ;HJURP;HMGB2;HMMR;KIAA0101;KIF11;KIF14;KIF15;KIF18A;KIF18B;KIF20A;KIF2C;KIF4A;KPNA2;MAD2L1;MCM10;MCM2;MCM6;MELK;MKI67;MLF1IP;NCAPG;NCAPH;NDC80;NEK2;PBK;PLK1;PLK4;POLA2;RAD51A…
CDC6	990	0.475	0.929	cell division cycle 6 homolog (S. cerevisiae)	990	APOBEC3B;AURKA;AURKB;BIRC5;BLM;BUB1B;CCNA2;CCNB2;CCNE2;CCT5;CDC2;CDC20;CDC25A;CDC45L;CDC7;CDKN3;CDT1;CENPA;CENPE;CENPF;CHEK1;CKS2;CTPS;CTSL2;DLGAP5;E2F1;ESPL1;EXO1;EZH2;FANCI;FEN1;GINS1;GPR19;GTSE1;HMMR;KIAA0101;KIF11;KIF14;KIF23;KIF2C;KIFC1;KPNA2;MAD2L1;MCM2;MCM3;MCM6;MELK;MKI67;MYBL2;NCAPD2;NCAPH;NDC80;NEK2;PLK1;PLK4;POLE2;PTTG3P;RAD51AP1;RFC4;RNASEH2A;RRM2;SMC4;SPAG5;SPC25;SRPK1;STIL;TK1;TMPO;…
CDCA8	55143	0.475	1.792	cell division cycle associated 8	55143	AMD1;ANP32E;APOBEC3B;ASPM;AURKA;AURKB;BIRC5;BUB1B;CCNA2;CCNB1;CCNB2;CCT5;CDC2;CDC20;CDC45L;CDCA3;CDKN3;CEBPG;CENPA;CENPE;CENPF;CENPN;CEP55;CHAF1B;CHEK1;CKS1B;CKS2;CTPS;DBF4;DKC1;DLGAP5;DTL;ERCC6L;ESPL1;EXO1;EZH2;FANCI;FEN1;GINS1;GPSM2;GTSE1;H2AFZ;HJURP;HMGB2;HMMR;IMPA2;KIAA0101;KIF11;KIF14;KIF15;KIF18A;KIF18B;KIF20A;KIF23;KIF2C;KIF4A;KPNA2;LAPTM4B;MAD2L1;MCM10;MCM2;MCM6;MCM7;MELK;MLF1IP;MTHFD2;MY…
CYCS	54205	0.474	0.515	cytochrome c, somatic	54205	AMD1;AURKA;BIRC5;CBX3;CCNB2;CCT5;CCT6A;CDC2;CDC20;CDKN3;CENPA;CENPE;CKS1B;CKS2;DBF4;DLGAP5;GINS1;H2AFZ;HMMR;HPRT1;KIAA0101;KIF11;KPNA2;LAPTM4B;MAD2L1;MCM6;MELK;MTHFD2;NAE1;NDC80;POLR2K;PSMB2;PSMD14;RAD51AP1;RRM2;SLBP;SMC4;SNRPD1;SNRPG;STRAP;TFRC;TPX2;TRIP13;TTK;UBE2C;UBE2V2;UQCRH;XPOT
KIFC1	3833	0.473	1.365	kinesin family member C1	3833	APOBEC3B;AURKA;AURKB;BIRC5;BLM;BUB1B;CCNA2;CCNB2;CCNE2;CDC2;CDC20;CDC25A;CDC6;CDKN3;CDT1;CENPA;CENPE;CENPF;CHEK1;CKS2;CTPS;DLGAP5;DNAJC9;E2F1;ESPL1;EXO1;EZH2;FANCI;FEN1;GINS1;GTSE1;HMGA1;HMMR;KIAA0101;KIF11;KIF14;KIF18B;KIF23;KIF2C;KPNA2;MAD2L1;MCM2;MCM3;MCM6;MELK;MKI67;MYBL2;NCAPH;NDC80;NEK2;PLK1;RAD51AP1;RNASEH2A;RRM2;SLC7A5;SPAG5;SPC25;STIL;TK1;TMPO;TOP2A;TPX2;TRIP13;TTK;UBE2C;ZWINT
UQCRH	7388	0.473	0.598	ubiquinol-cytochrome c reductase hinge protein	7388	AMD1;BIRC5;CCNB2;CCT5;CCT6A;CDC2;CDC20;CDC45L;CDCA8;CDKN3;CEBPG;CENPA;CENPN;CHAF1B;CHEK1;CKS1B;CKS2;CTPS;CYCS;DBF4;DEK;DKC1;DLGAP5;ERCC6L;EZH2;FEN1;GINS1;GPSM2;H2AFZ;HMGB2;IMPA2;IRAK1;KIAA0101;KIF2C;KPNA2;LAPTM4B;MAD2L1;MCM6;MELK;MTHFD2;NAE1;NCAPG;NDC80;NDUFA9;NUP155;NUP205;PHGDH;POLR2K;PSMB2;PSMD14;RAD51AP1;RAD54L;RFC4;RRM2;SHFM1;SNRPA1;SNRPC;SNRPD1;SNRPG;TFRC;TPX2;TRIP13;TTK;UBE2C;UBE2V2;UCK2;V…
E2F1	1869	0.472	0.693	E2F transcription factor 1	1869	APOBEC3B;AURKA;AURKB;BIRC5;BLM;BUB1B;CCNA2;CCNB2;CCNE2;CDC2;CDC20;CDC25A;CDC45L;CDC6;CDC7;CDKN3;CDT1;CENPA;CENPE;CENPF;CHEK1;CKS2;CSE1L;CTPS;CTSL2;DLGAP5;DNAJC9;ESPL1;EXO1;EZH2;FANCI;FEN1;GINS1;GTSE1;HMMR;KIAA0101;KIF11;KIF14;KIF2C;KIFC1;KNTC1;KPNA2;MAD2L1;MCM2;MCM3;MCM6;MELK;MKI67;MYBL2;NCAPH;NDC80;NEK2;PLK1;POLE2;PSRC1;PTDSS1;PTTG3P;RAD51;RAD51AP1;RAD54L;RFC4;RNASEH2A;RRM2;SLC7A5;SPAG5;SPC25;SR…
SNRPA1	6627	0.472	0.594	small nuclear ribonucleoprotein polypeptide A'	6627	ANP32E;ASPM;AURKA;BIRC5;BUB1B;CBX3;CCNB1;CCNB2;CCT5;CCT6A;CDC2;CDC20;CDCA3;CDCA8;CENPA;CENPE;CENPN;CEP55;CKS2;DBF4;DKC1;DLGAP5;DNAJC9;ESPL1;EZH2;FANCI;FEN1;GINS1;GPSM2;GTSE1;H2AFZ;HJURP;HMGB2;KIF15;KIF18A;KIF18B;KIF4A;KPNA2;MAD2L1;MCM6;MELK;MLF1IP;MTHFD2;NCAPG;NDC80;PBK;PRC1;RAD51AP1;RFC4;RRM2;SHFM1;SNRPG;TACC3;TAF11;TRIP13;TTK;UBE2C;UQCRH;VRK1;ZWINT
HDAC2	3066	0.47	0.67	histone deacetylase 2	3066	ACTL6A;AMD1;CCT6A;CENPA;DBF4;DEK;EZH2;MAD2L1;MCM6;MELK;MTHFD2;NUP153;RAD51AP1;RFC4;TAF11;TMSB15A;TTK;UBA2
CDCA3	83461	0.468	1.406	cell division cycle associated 3	83461	ANP32E;ASPM;AURKA;AURKB;BIRC5;BUB1B;CCNA2;CCNB1;CCNB2;CCT5;CDC2;CDC20;CDC45L;CDCA8;CDKN3;CENPA;CENPE;CENPF;CENPN;CEP55;CHEK1;CKS1B;CKS2;CTPS;DBF4;DKC1;DLGAP5;DTL;ERCC6L;ESPL1;EXO1;EZH2;FANCI;FEN1;GINS1;GPSM2;GTSE1;H2AFZ;HJURP;HMGB2;HMMR;KIAA0101;KIF11;KIF14;KIF15;KIF18A;KIF18B;KIF20A;KIF2C;KIF4A;KPNA2;LAPTM4B;MAD2L1;MCM10;MCM2;MCM6;MCM7;MELK;MKI67;MLF1IP;MYBL2;NCAPD2;NCAPG;NCAPH;NDC80;NEK2;PBK;PL…
XPOT	11260	0.468	0.577	exportin, tRNA (nuclear export receptor for tRNAs)	11260	ACTL6A;AMD1;AURKA;CCNB2;CCT5;CCT6A;CDC2;CDC20;CEBPG;CENPA;CKS1B;CYCS;DBF4;DLGAP5;EZH2;GGH;GINS1;KIF23;KPNA2;MAD2L1;MCM6;MELK;MTHFD2;NDC80;POLR2K;PSMD14;RAD51AP1;RRM2;SNRPD1;TAF2;TPX2;TTK;UBA2;UBE2C;UBE2V2;UQCRH
CEP55	55165	0.467	1.271	centrosomal protein 55kDa	55165	ANP32E;ASPM;AURKA;AURKB;BIRC5;BUB1B;CCNA2;CCNB1;CCNB2;CDC2;CDC20;CDCA3;CDCA8;CDKN3;CENPA;CENPE;CENPF;CENPN;CHEK1;CKS1B;CKS2;DBF4;DKC1;DLGAP5;DTL;ERCC6L;ESPL1;EXO1;EZH2;FANCI;FEN1;GINS1;GPSM2;GTSE1;H2AFZ;HJURP;HMGB2;HMMR;KIAA0101;KIF11;KIF14;KIF15;KIF18A;KIF18B;KIF20A;KIF2C;KIF4A;KPNA2;MAD2L1;MCM10;MCM6;MELK;MKI67;MLF1IP;MYBL2;NCAPG;NCAPH;NDC80;NEK2;PBK;PLK1;PRC1;RAD51AP1;RFC4;RNASEH2A;RRM2;SMC4;S…
PTTG3P	26255	0.466	1.174	pituitary tumor-transforming 3	26255	AURKA;AURKB;BIRC5;BLM;BUB1B;CCNA2;CCNB2;CCNE2;CDC2;CDC20;CDC6;CDC7;CDKN3;CENPA;CENPE;CENPF;CHEK1;CKS2;DLGAP5;E2F1;ESPL1;EXO1;EZH2;FANCI;FEN1;GINS1;GTSE1;HMMR;KIAA0101;KIF11;KIF14;KIF2C;KPNA2;MAD2L1;MCM2;MCM6;MELK;MKI67;MYBL2;NCAPH;NDC80;NEK2;PLK1;PSRC1;RAD51AP1;RFC4;RNASEH2A;RRM2;SPAG5;SPC25;STIL;TK1;TOP2A;TPX2;TRIP13;TTK;UBE2C;ZWINT
TMSB15A	11013	0.466	1.308	thymosin beta 15a	11013	AMD1;AURKA;BIRC5;BLM;BUB1B;CCNA2;CCNB2;CDC2;CDC20;CDC7;CDKN3;CENPA;CENPF;CHEK1;CTPS;CTSL2;DLGAP5;DNAJC9;E2F1;EXO1;EZH2;FEN1;GGH;GINS1;GPR19;GTSE1;HDAC2;KIF14;KIF2C;MAD2L1;MCM2;MCM3;MCM6;MELK;MKI67;MYBL2;NCAPH;NDC80;NMU;NUP205;PHGDH;PLK1;PSRC1;RAD51AP1;RFC4;SLC7A5;SRPK1;STIL;STMN1;TK1;TPX2;TRIP13;TTK;UBE2C;ZWINT
NCAPG	64151	0.464	1.122	non-SMC condensin I complex, subunit G	64151	ANP32E;ASPM;AURKA;AURKB;BIRC5;BUB1B;CCNA2;CCNB1;CCNB2;CCT5;CDC2;CDC20;CDC45L;CDCA3;CDCA8;CDKN3;CENPA;CENPE;CENPF;CENPN;CEP55;CHEK1;CKS1B;CKS2;DBF4;DKC1;DLGAP5;DTL;ERCC6L;ESPL1;EZH2;FANCI;FEN1;GINS1;GPSM2;GTSE1;H2AFZ;HJURP;HMGB2;HMMR;KIAA0101;KIF11;KIF14;KIF15;KIF18A;KIF18B;KIF20A;KIF4A;KPNA2;MAD2L1;MCM10;MCM6;MELK;MLF1IP;MTHFD2;NDC80;NEK2;PBK;PRC1;PSMD14;RAD51AP1;RFC4;RNASEH2A;RRM2;SMC4;SNRPA1;SN…
H2AFZ	3015	0.463	0.743	H2A histone family, member Z	3015	AMD1;ANP32E;ASPM;AURKA;AURKB;BIRC5;CBX3;CCNB1;CCNB2;CCT5;CCT6A;CDC2;CDC20;CDC45L;CDCA3;CDCA8;CDKN3;CEBPG;CENPA;CENPE;CENPN;CEP55;CHAF1B;CHEK1;CKS1B;CKS2;COQ2;CYCS;DBF4;DEK;DKC1;DLGAP5;DTL;ERCC6L;EZH2;FANCI;FEN1;GINS1;GPSM2;GTSE1;HJURP;HMGB2;HMMR;HPRT1;IMPA2;KIAA0101;KIF14;KIF15;KIF18A;KIF18B;KIF20A;KIF23;KIF4A;KPNA2;LAPTM4B;MAD2L1;MCM10;MCM2;MCM6;MELK;MLF1IP;MTHFD2;NAE1;NCAPG;NDC80;NEK2;NUP155;PB…
RAD51	5888	0.463	0.946	RAD51 homolog (RecA homolog, E. coli) (S. cerevisiae)	5888	AURKA;AURKB;BIRC5;BLM;BUB1B;CCNA2;CCNB2;CCNE2;CDC2;CDC20;CDKN3;CENPA;CENPE;CENPF;CHEK1;CKS2;DLGAP5;E2F1;ESPL1;EXO1;EZH2;FANCI;FEN1;GINS1;GTSE1;HMMR;KIAA0101;KIF11;KIF14;KIF23;KIF2C;MAD2L1;MCM2;MCM6;MELK;MKI67;MYBL2;NCAPH;NDC80;NEK2;PLK1;RAD51AP1;RRM2;SPAG5;STIL;TK1;TOP2A;TPX2;TRIP13;TTK;UBE2C;ZWINT
CDC25A	993	0.462	0.947	cell division cycle 25 homolog A (S. pombe)	993	AURKA;AURKB;BIRC5;BLM;BUB1B;CCNA2;CCNB2;CDC2;CDC20;CDC45L;CDC6;CDKN3;CDT1;CENPA;CENPE;CENPF;CHEK1;CKS2;CTPS;DLGAP5;DNAJC9;E2F1;ESPL1;EXO1;EZH2;FANCI;FEN1;GINS1;GTSE1;HMMR;KIAA0101;KIF11;KIF14;KIF2C;KIFC1;KPNA2;MCM2;MCM3;MCM6;MELK;MKI67;MYBL2;NCAPD2;NCAPH;NDC80;PHGDH;PLK1;PSRC1;RAD51AP1;RAD54L;RFC4;RRM2;SLC7A5;SPAG5;SPC25;SRPK1;STIL;TK1;TOP2A;TPX2;TRIP13;TTK;UBE2C;ZWINT
UBA2	10054	0.461	0.486	ubiquitin-like modifier activating enzyme 2	10054	ACTL6A;CBX3;CCT6A;CEBPG;DBF4;DEK;HDAC2;HMGB2;HPRT1;KPNA2;MAD2L1;MTHFD2;NUP153;RAD51AP1;TAF2;TTK;XPOT
CTSL2	1515	0.459	1.002	cathepsin L2	1515	AMD1;APOBEC3B;AURKA;AURKB;BIRC5;BLM;BUB1B;CCNA2;CCNB2;CDC2;CDC20;CDC6;CDC7;CDKN3;CENPA;CENPE;CENPF;CHEK1;CTPS;DEK;DLGAP5;DNAJC9;E2F1;EXO1;EZH2;FEN1;GINS1;GTSE1;HMMR;IMPA2;IRAK1;KIF11;KIF14;KIF2C;KPNA2;MAD2L1;MCM2;MCM3;MCM6;MELK;MKI67;MYBL2;NCAPH;NDC80;NEK2;PHGDH;PLK1;PSRC1;RAD51AP1;RFC4;RRM2;SHFM1;SLC7A5;SMC2;SMC4;SPC25;SRPK1;STIL;TMSB15A;TPX2;TRIP13;TTK;UBE2C;ZWINT
HPRT1	3251	0.459	0.585	hypoxanthine phosphoribosyltransferase 1	3251	ANP32E;AURKA;BIRC5;CCNB2;CCT5;CDC2;CENPA;CKS1B;CKS2;CYCS;DBF4;DKC1;DLGAP5;FEN1;GINS1;H2AFZ;HMGB2;HMMR;KIAA0101;KPNA2;MAD2L1;MCM2;MCM6;MELK;NDC80;NEK2;POLR2K;PSMD14;RAD51AP1;SLBP;SMC4;SNRPD1;STRAP;TOP2A;TPX2;TRIP13;TTK;UBA2;UBE2C
PSMD14	10213	0.458	0.479	proteasome (prosome, macropain) 26S subunit, non-ATPase, 14	10213	AURKA;BIRC5;BUB1B;CCNA2;CCNB1;CCNB2;CCT5;CCT6A;CDC2;CDC20;CDC45L;CDCA8;CDKN3;CEBPG;CENPA;CENPE;CENPF;CENPN;CHAF1B;CHEK1;CKS1B;CKS2;COQ2;CSE1L;CYCS;DBF4;DLGAP5;FANCI;FEN1;GGH;GINS1;H2AFZ;HPRT1;IRAK1;KIAA0101;KIF14;KIF23;KPNA2;MAD2L1;MCM6;MELK;MLF1IP;MTHFD2;NCAPG;NDC80;NDUFA9;NUP155;POLR2K;PSMB2;RAD51AP1;RRM2;SNRPC;SNRPD1;SNRPG;SPAG5;STRAP;TFRC;TOP2A;TPX2;TRIP13;TTK;UBE2C;UBE2V2;UCK2;UQCRH;VRK1;XPO…
CCT6A	908	0.456	0.537	chaperonin containing TCP1, subunit 6A (zeta 1)	908	AURKA;CBX3;CCNB2;CCT5;CDC2;CDC20;CEBPG;CENPA;CENPE;CKS1B;CKS2;CSE1L;CYCS;DBF4;DEK;DKC1;DLGAP5;DPM1;EZH2;GGH;GINS1;H2AFZ;HDAC2;HMGB2;IRAK1;KPNA2;MAD2L1;MCM6;MELK;MTHFD2;NAE1;NDC80;NUP155;POLR2K;PSMD14;RAD51AP1;RRM2;SHFM1;SNRPA1;SNRPD1;SNRPG;TFRC;TOP2A;TRIP13;TTK;UBA2;UBE2V2;UQCRH;VRK1;XPOT
HJURP	55355	0.456	1.293	Holliday junction recognition protein	55355	ANP32E;ASPM;AURKA;AURKB;BIRC5;BUB1B;CCNA2;CCNB1;CCNB2;CDC2;CDC20;CDC45L;CDCA3;CDCA8;CDKN3;CENPA;CENPE;CENPF;CENPN;CEP55;CHEK1;CKS1B;CKS2;CTPS;DKC1;DLGAP5;DTL;ERCC6L;ESPL1;EXO1;EZH2;FANCI;FEN1;GINS1;GPSM2;GTSE1;H2AFZ;HMGB2;HMMR;KIAA0101;KIF11;KIF14;KIF15;KIF18A;KIF18B;KIF20A;KIF2C;KIF4A;KPNA2;MAD2L1;MCM10;MCM2;MCM3;MCM6;MELK;MKI67;MLF1IP;MYBL2;NCAPG;NCAPH;NDC80;NEK2;PBK;PLK1;PRC1;RAD51AP1;RFC4;RNA…
KIF18B	146909	0.454	1.018	kinesin family member 18B	146909	ANP32E;ASPM;AURKA;AURKB;BIRC5;BLM;BUB1B;CCNA2;CCNB1;CCNB2;CDC2;CDC20;CDC45L;CDCA3;CDCA8;CDKN3;CENPA;CENPE;CENPF;CENPN;CEP55;CHEK1;CKS2;CTPS;DKC1;DLGAP5;DTL;ERCC6L;ESPL1;EXO1;EZH2;FANCI;FEN1;GINS1;GPSM2;GTSE1;H2AFZ;HJURP;HMGB2;HMMR;KIAA0101;KIF11;KIF14;KIF15;KIF18A;KIF20A;KIF2C;KIF4A;KIFC1;KPNA2;MAD2L1;MCM10;MCM2;MCM3;MCM6;MELK;MKI67;MLF1IP;NCAPG;NCAPH;NDC80;NEK2;PBK;PLK1;PRC1;PSRC1;RAD51AP1;RFC4;…
PTDSS1	9791	0.454	0.583	phosphatidylserine synthase 1	9791	AMD1;AURKA;BIRC5;BLM;BUB1B;CCNA2;CCNB2;CCNE2;CCT5;CDC20;CDKN3;CENPA;CENPE;CHEK1;CKS2;CTPS;DLGAP5;E2F1;EXO1;FEN1;GGH;GINS1;HMGA1;IMPA2;IRAK1;KIF14;KIF2C;KPNA2;LAPTM4B;MAD2L1;MCM2;MCM3;MCM6;MELK;MKI67;MYBL2;NCAPD2;NCAPH;NDC80;NUP205;PLK1;POLR2K;RAD51AP1;SLC7A5;SRPK1;STIL;TAF2;TPX2;TRIP13;TTK;UBE2C
KNTC1	9735	0.453	0.788	kinetochore associated 1	9735	AURKA;BIRC5;BLM;BUB1B;CCNA2;CCNB2;CCNE2;CDC2;CDC20;CDC7;CENPA;CENPE;CENPF;CSE1L;DLGAP5;E2F1;ESPL1;EXO1;EZH2;FANCI;GINS1;HMGB2;HMMR;KIAA0101;KIF11;KIF14;KIF2C;MCM2;MCM3;MCM6;MELK;MKI67;NDC80;RAD51AP1;RFC4;SMC4;SPAG5;TOP2A;TOPBP1;TPX2;TRIP13;TTK;UBE2C;ZWINT
SHFM1	7979	0.453	0.687	split hand/foot malformation (ectrodactyly) type 1	7979	AURKA;CCNB2;CCT6A;CENPA;CENPE;CENPF;CKS1B;CKS2;CSE1L;CTSL2;DBF4;EZH2;GINS1;HMGB2;MAD2L1;MCM3;MELK;NDC80;NUP205;RAD51AP1;RFC4;SNRPA1;SNRPG;UQCRH
MSH2	4436	0.452	0.541	mutS homolog 2, colon cancer, nonpolyposis type 1 (E. coli)	4436	AMD1;CCNA2;CDC2;CDC7;CENPA;CHEK1;CKS1B;CTPS;DEK;DLGAP5;FEN1;GPSM2;KIF11;KIF2C;MAD2L1;MCM2;MCM3;MCM6;MCM7;NAE1;NEK2;NUP153;RAD51AP1;RFC3;RFC4;SMC2;SMC4;SNRPC;SRPK1;TPX2
NMU	10874	0.443	2.121	neuromedin U	10874	BIRC5;BUB1B;CCNA2;CCNB2;CDC2;CDC20;CDKN3;CENPA;CENPF;CHEK1;CKS1B;DLGAP5;EZH2;GTSE1;KIF14;KIF2C;MAD2L1;MCM6;MELK;MKI67;NDC80;RAD51AP1;RRM2;TMSB15A;TPX2;TRIP13;TTK;UBE2C
CENPN	55839	0.441	1.377	centromere protein N	55839	ANP32E;ASPM;AURKA;BIRC5;CCNB1;CCNB2;CCT5;CDC2;CDC20;CDC45L;CDCA3;CDCA8;CDKN3;CEBPG;CENPA;CENPE;CEP55;CHEK1;CKS1B;CKS2;DBF4;DKC1;DLGAP5;DTL;ERCC6L;FANCI;FEN1;GINS1;GPSM2;GTSE1;H2AFZ;HJURP;HMGB2;KIAA0101;KIF14;KIF15;KIF18A;KIF18B;KIF20A;KIF4A;KPNA2;LAPTM4B;MAD2L1;MCM10;MCM6;MELK;MLF1IP;MTHFD2;NCAPG;NEK2;NUP155;PBK;POLR2K;PRC1;PSMB2;PSMD14;RAD51AP1;RFC4;RNASEH2A;RRM2;SNRPA1;SNRPC;SNRPD1;SNRPG;SPAG5;…
PBK	55872	0.438	1.212	PDZ binding kinase	55872	ANP32E;ASPM;AURKA;BIRC5;CCNB1;CCNB2;CDC2;CDCA3;CDCA8;CDKN3;CENPA;CENPE;CENPF;CENPN;CEP55;CKS1B;CKS2;DBF4;DKC1;DLGAP5;DTL;ERCC6L;ESPL1;FANCI;FEN1;GINS1;GPSM2;GTSE1;H2AFZ;HJURP;HMGB2;HMMR;KIAA0101;KIF14;KIF15;KIF18A;KIF18B;KIF20A;KIF4A;KPNA2;MAD2L1;MCM10;MELK;MLF1IP;NCAPG;NDC80;NEK2;PRC1;RAD51AP1;RRM2;SMC4;SNRPA1;SNRPD1;SNRPG;SPAG5;TACC3;TOP2A;TPX2;UBE2C;WDHD1;ZWINT
SLC7A5	8140	0.438	1.294	solute carrier family 7 (cationic amino acid transporter, y+ system), member 5	8140	AMD1;APOBEC3B;AURKA;AURKB;BIRC5;BLM;BUB1B;CCNA2;CCNB2;CCT5;CDC2;CDC20;CDC25A;CDC45L;CDKN3;CDT1;CENPA;CENPE;CENPF;CHEK1;CTPS;CTSL2;DKC1;DLGAP5;E2F1;ESPL1;EXO1;EZH2;FANCI;FEN1;GINS1;GPR19;GTSE1;HMGA1;HMMR;IRAK1;KIF11;KIF14;KIF2C;KIFC1;KPNA2;MAD2L1;MCM2;MCM6;MCM7;MELK;MKI67;MTHFD2;MYBL2;NCAPD2;NCAPH;NDC80;NEK2;NUP205;PHGDH;PLK1;PTDSS1;RAD51AP1;RRM2;SPAG5;SRPK1;STIL;TK1;TMSB15A;TOP2A;TPX2;TRIP13;TTK;…
CBX3	11335	0.435	0.48	chromobox homolog 3 (HP1 gamma homolog, Drosophila)	11335	CCT6A;CDC2;CKS1B;CYCS;DBF4;DEK;DPM1;H2AFZ;HMGB2;MAD2L1;POLR2K;RAD51AP1;SMC4;SNRPA1;SNRPD1;SNRPG;STRAP;UBA2;UBE2V2;VRK1
PRIM1	5557	0.435	0.534	primase, DNA, polypeptide 1 (49kDa)	5557	AURKA;CCNA2;CCNB2;CCNE2;CDC2;CDKN3;CENPA;CKS1B;CKS2;DLGAP5;FEN1;GINS1;H2AFZ;HMGB2;HMMR;KIAA0101;KIF11;KPNA2;MAD2L1;MCM2;MELK;NDC80;NEK2;POLE2;POLR2K;RAD51AP1;RNASEH2A;RRM2;SMC2;SPAG5;TOP2A;UBE2C;ZWINT
NUP153	9972	0.434	0.489	nucleoporin 153kDa	9972	ACTL6A;BUB1B;CCNA2;CDC7;DEK;EZH2;HDAC2;KIF11;KPNA2;MAD2L1;MCM2;MCM3;MCM6;MKI67;MSH2;NCAPH;RAD51AP1;SRPK1;TAF11;TTK;UBA2
PSRC1	84722	0.434	0.628	proline/serine-rich coiled-coil 1	84722	AURKA;BIRC5;BLM;BUB1B;CCNA2;CCNB2;CDC20;CDC25A;CDC7;CDKN3;CENPA;CENPF;CHEK1;CTPS;CTSL2;DLGAP5;DNAJC9;E2F1;ESPL1;EXO1;EZH2;FEN1;GINS1;GTSE1;HMMR;KIF11;KIF14;KIF18B;KIF2C;MCM2;MCM3;MCM6;MELK;MKI67;MYBL2;NCAPH;NEK2;PLK1;PTTG3P;RAD51AP1;RFC4;SPC25;SRPK1;STIL;TK1;TMSB15A;TPX2;TRIP13;TTK;UBE2C;ZWINT
CCNB1	891	0.433	0.964	cyclin B1	891	ANP32E;ASPM;AURKA;AURKB;BIRC5;BUB1B;CCNB2;CCT5;CDC2;CDC20;CDC45L;CDCA3;CDCA8;CDKN3;CEBPG;CENPA;CENPE;CENPF;CENPN;CEP55;CHAF1B;CHEK1;CKS1B;CKS2;DBF4;DKC1;DLGAP5;DTL;ERCC6L;ESPL1;FANCI;FEN1;GINS1;GPSM2;GTSE1;H2AFZ;HJURP;HMGB2;HMMR;KIAA0101;KIF14;KIF15;KIF18A;KIF18B;KIF20A;KIF23;KIF4A;KPNA2;LAPTM4B;MAD2L1;MCM10;MELK;MLF1IP;NCAPG;NDC80;NEK2;NUP155;PBK;POLR2K;PRC1;PSMB2;PSMD14;RAD51AP1;RNASEH2A;RRM2;S…
MCM7	4176	0.433	0.65	minichromosome maintenance complex component 7	4176	AMD1;AURKB;BIRC5;CCNA2;CCNB2;CDC2;CDC20;CDC45L;CDCA3;CDCA8;CDKN3;CDT1;CENPA;CENPF;CHEK1;CKS1B;CTPS;DBF4;DKC1;DLGAP5;EZH2;FEN1;GTSE1;HMGA1;IMPA2;KIF14;KIF2C;MAD2L1;MCM2;MCM3;MCM6;MELK;MKI67;MSH2;MYBL2;NCAPD2;NEK2;NUP205;PHGDH;RAD51AP1;RFC3;RFC4;RNASEH2A;SLC7A5;SMC4;SNRPC;SNRPD1;TPX2;TRIP13;TTK;UBE2C;UCK2
DPM1	8813	0.432	0.478	dolichyl-phosphate mannosyltransferase polypeptide 1, catalytic subunit	8813	ACTL6A;AURKA;CBX3;CCT6A;CSE1L;DEK;MAD2L1;NAE1;POLR2K;RAD51AP1;SMC2;UBE2V2
TAF11	6882	0.431	0.504	TAF11 RNA polymerase II, TATA box binding protein (TBP)-associated factor, 28kDa	6882	ACTL6A;EZH2;HDAC2;MELK;NUP153;RAD51AP1;RFC4;SNRPA1;STIL;TTK
MLF1IP	79682	0.43	0.953	MLF1 interacting protein	79682	ASPM;BIRC5;CCNB1;CCNB2;CDC2;CDC45L;CDCA3;CDCA8;CDKN3;CENPA;CENPE;CENPF;CENPN;CEP55;CKS1B;CKS2;DBF4;DLGAP5;DTL;ERCC6L;ESPL1;EZH2;FANCI;FEN1;GINS1;GPSM2;GTSE1;H2AFZ;HJURP;HMGB2;HMMR;KIAA0101;KIF11;KIF14;KIF15;KIF18A;KIF18B;KIF20A;KIF4A;KPNA2;MAD2L1;MCM10;MELK;MTHFD2;NCAPG;NDC80;NEK2;PBK;PRC1;PSMD14;RAD51AP1;RRM2;SMC4;SNRPA1;SNRPD1;SNRPG;SPAG5;TACC3;TOP2A;TPX2;TRIP13;UBE2C;VRK1;WDHD1;ZWINT
POLR2K	5440	0.43	0.644	polymerase (RNA) II (DNA directed) polypeptide K, 7.0kDa	5440	AURKA;BIRC5;CBX3;CCNB1;CCNB2;CCNE2;CCT5;CCT6A;CDC2;CDCA8;CDKN3;CEBPG;CENPA;CENPN;CKS1B;CKS2;COQ2;CYCS;DLGAP5;DPM1;EMG1;GGH;GINS1;H2AFZ;HMGB2;HPRT1;KIAA0101;KPNA2;LAPTM4B;MAD2L1;MELK;MTHFD2;NDC80;NUP155;PRIM1;PSMB2;PSMD14;PTDSS1;RAD51AP1;SLBP;SNRPC;SNRPD1;SNRPG;TAF2;UBE2C;UBE2V2;UQCRH;VRK1;XPOT
PSMB2	5690	0.428	0.543	proteasome (prosome, macropain) subunit, beta type, 2	5690	APOBEC3B;AURKA;BIRC5;CCNB1;CCNB2;CCT5;CDC2;CDC20;CDC45L;CDCA8;CDKN3;CEBPG;CENPA;CENPE;CENPN;CHAF1B;CHEK1;CKS1B;CKS2;CTPS;CXCL10;CYCS;DBF4;DKC1;DLGAP5;ERCC6L;EZH2;FEN1;GINS1;GPSM2;H2AFZ;IMPA2;IRAK1;KIAA0101;KIF2C;KPNA2;LAPTM4B;MAD2L1;MCM2;MCM6;MELK;MTHFD2;NDC80;NDUFA9;NUP155;NUP205;POLA2;POLR2K;PSMD14;RAD51AP1;RAD54L;RFC4;RNASEH2A;RRM2;SNRPC;SNRPD1;SNRPG;SPAG5;TACC3;TFRC;TPX2;TRIP13;TTK;UBE2C;UCK2…
SLBP	7884	0.428	0.503	stem-loop binding protein	7884	CCNB2;CCT5;CDC2;CENPA;CKS1B;CKS2;CYCS;DBF4;DEK;GINS1;H2AFZ;HMGB2;HPRT1;KIAA0101;KPNA2;MAD2L1;MCM2;MCM6;POLR2K;RAD51AP1;RRM2;SMC4;SNRPC;SNRPD1;STRAP
UCK2	7371	0.428	0.721	uridine-cytidine kinase 2	7371	AMD1;ANP32E;AURKB;BIRC5;CCNA2;CCNB2;CCT5;CDC2;CDC20;CDC45L;CDCA3;CDCA8;CDKN3;CEBPG;CENPA;CENPE;CENPF;CENPN;CHAF1B;CHEK1;CKS1B;CKS2;CTPS;DBF4;DKC1;DLGAP5;EMG1;EXO1;EZH2;FEN1;GINS1;GPSM2;GTSE1;H2AFZ;HMGA1;IMPA2;IRAK1;KIF14;KIF2C;KPNA2;LAPTM4B;MAD2L1;MCM2;MCM3;MCM6;MCM7;MELK;MYBL2;NCAPD2;NDC80;NEK2;NUP155;NUP205;PSMB2;PSMD14;RAD51AP1;RFC3;RFC4;RNASEH2A;RRM2;SLC7A5;SMC4;SNRPC;SNRPD1;SNRPG;SPAG5;SRPK1…
IMPA2	3613	0.427	1.053	inositol(myo)-1(or 4)-monophosphatase 2	3613	AMD1;AURKB;BIRC5;CCNB2;CCT5;CDC2;CDC20;CDC45L;CDCA8;CDKN3;CEBPG;CENPA;CHAF1B;CHEK1;CKS1B;CTPS;CTSL2;DBF4;DEK;DKC1;DLGAP5;FEN1;GINS1;GPSM2;H2AFZ;HMGA1;IRAK1;KIF14;KIF2C;LAPTM4B;MAD2L1;MCM2;MCM3;MCM6;MCM7;MELK;NAE1;NDC80;NUP155;NUP205;PHGDH;PSMB2;PTDSS1;RAD51AP1;RFC3;RFC4;RNASEH2A;SNRPC;SNRPD1;SRPK1;TPX2;UBE2C;UCK2;UQCRH
ERCC6L	54821	0.426	1.457	excision repair cross-complementing rodent repair deficiency, complementation group 6-like	54821	ANP32E;ASPM;AURKA;BIRC5;CCNB1;CCNB2;CDC2;CDC20;CDCA3;CDCA8;CDKN3;CENPA;CENPE;CENPF;CENPN;CEP55;CKS1B;CKS2;DBF4;DKC1;DLGAP5;DTL;ESPL1;FANCI;FEN1;GINS1;GPSM2;GTSE1;H2AFZ;HJURP;HMGB2;KIAA0101;KIF14;KIF15;KIF18A;KIF18B;KIF20A;KIF4A;KPNA2;MAD2L1;MCM10;MELK;MLF1IP;NCAPG;NDC80;NEK2;NUP155;PBK;PRC1;PSMB2;RAD51AP1;RRM2;SMC4;SNRPD1;SNRPG;SPAG5;TACC3;TOP2A;TPX2;UBE2C;UQCRH;VRK1;ZWINT
MCM10	55388	0.425	1.608	minichromosome maintenance complex component 10	55388	ANP32E;ASPM;AURKA;AURKB;BIRC5;BUB1B;CCNA2;CCNB1;CCNB2;CDC2;CDC20;CDCA3;CDCA8;CDKN3;CENPA;CENPE;CENPF;CENPN;CEP55;CHEK1;CTPS;DLGAP5;DTL;ERCC6L;ESPL1;EZH2;GPSM2;GTSE1;H2AFZ;HJURP;HMMR;KIF11;KIF14;KIF15;KIF18A;KIF18B;KIF20A;KIF2C;KIF4A;KPNA2;MAD2L1;MCM2;MCM6;MELK;MKI67;MLF1IP;MYBL2;NCAPG;NCAPH;NDC80;NEK2;PBK;PLK1;PRC1;RAD51AP1;RRM2;TACC3;TPX2;TRIP13;TTK;UBE2C;ZWINT
IRAK1	3654	0.424	0.642	interleukin-1 receptor-associated kinase 1	3654	APOBEC3B;AURKA;BIRC5;CCNA2;CCNB2;CCT5;CCT6A;CDC20;CDKN3;CEBPG;CENPA;CHEK1;CKS1B;CKS2;CTPS;CTSL2;DKC1;DLGAP5;EZH2;FEN1;GINS1;IMPA2;KIF2C;MCM2;MCM6;MELK;MYBL2;NDC80;PSMB2;PSMD14;PTDSS1;RAD51AP1;RFC4;SLC7A5;SNRPC;TPX2;TRIP13;TTK;UBE2C;UCK2;UQCRH
NUP155	9631	0.424	0.807	nucleoporin 155kDa	9631	CCNB1;CCNB2;CCT5;CCT6A;CDC2;CDC20;CDC45L;CDCA8;CDKN3;CEBPG;CENPA;CENPN;CHAF1B;CHEK1;CKS1B;CKS2;DBF4;DEK;DKC1;DLGAP5;ERCC6L;FEN1;GINS1;GPSM2;H2AFZ;IMPA2;KPNA2;LAPTM4B;MAD2L1;MCM2;MCM6;MELK;MTHFD2;NDC80;NEK2;NUP205;POLR2K;PSMB2;PSMD14;RAD51AP1;RFC4;RRM2;SMC2;SNRPC;SNRPD1;SNRPG;TFRC;TPX2;TRIP13;UBE2V2;UCK2;UQCRH;VRK1
TFRC	7037	0.422	0.84	transferrin receptor (p90, CD71)	7037	AMD1;CCNA2;CCNB2;CCT5;CCT6A;CDC2;CDC20;CDKN3;CENPA;CHEK1;CKS1B;CKS2;CTPS;CYCS;DLGAP5;FEN1;GINS1;KPNA2;MAD2L1;MCM2;MCM6;MELK;MTHFD2;NUP155;PSMB2;PSMD14;RAD51AP1;RFC4;RRM2;TTK;UQCRH
DNMT1	1786	0.421	0.517	DNA (cytosine-5-)-methyltransferase 1	1786	CCNA2;CDC20;CENPA;CENPF;ESPL1;EZH2;KIF11;KPNA2;MCM2;MCM3;MCM6;MELK;NCAPH;NDC80;RAD51AP1;RFC4;RNASEH2A;TRIP13;TTK
POLA2	23649	0.421	0.839	polymerase (DNA directed), alpha 2 (70kD subunit)	23649	BIRC5;CCNB2;CDC2;CDC20;CDC45L;CENPA;CENPF;CHAF1B;CKS2;DLGAP5;EZH2;FANCI;FEN1;GINS1;HMGB2;KIAA0101;MCM2;MCM6;MELK;NDC80;PRC1;PSMB2;RAD51AP1;RNASEH2A;RRM2;SNRPG;SPAG5;TACC3;TPX2;TRIP13;UBE2C;ZWINT
DTL	51514	0.419	1.075	denticleless homolog (Drosophila)	51514	ANP32E;ASPM;BIRC5;CCNB1;CCNB2;CDC2;CDCA3;CDCA8;CDKN3;CENPA;CENPE;CENPF;CENPN;CEP55;CKS1B;CKS2;DBF4;ERCC6L;ESPL1;EZH2;FANCI;GINS1;GPSM2;GTSE1;H2AFZ;HJURP;HMGB2;KIAA0101;KIF14;KIF15;KIF18A;KIF18B;KIF20A;KIF4A;MAD2L1;MCM10;MCM6;MELK;MLF1IP;NCAPG;NEK2;PBK;PRC1;RAD51AP1;RNASEH2A;RRM2;SPAG5;TACC3;TOP2A;TPX2;UBE2C;WDHD1;ZWINT
STRAP	11171	0.419	0.44	serine/threonine kinase receptor associated protein	11171	CBX3;CCT5;CKS1B;CYCS;EMG1;H2AFZ;HPRT1;MAD2L1;NDUFA9;PSMD14;RAD51AP1;SLBP;SNRPD1;UBE2V2
TACC3	10460	0.419	1.429	transforming, acidic coiled-coil containing protein 3	10460	ANP32E;ASPM;AURKA;AURKB;BIRC5;BUB1B;CCNA2;CCNB1;CCNB2;CDC2;CDC20;CDC45L;CDCA3;CDCA8;CDKN3;CENPA;CENPE;CENPF;CENPN;CEP55;CKS1B;CKS2;DLGAP5;DTL;ERCC6L;ESPL1;EZH2;FANCI;FEN1;GINS1;GPSM2;GTSE1;H2AFZ;HJURP;HMGB2;HMMR;KIAA0101;KIF14;KIF15;KIF18A;KIF18B;KIF20A;KIF4A;KPNA2;MAD2L1;MCM10;MCM6;MELK;MLF1IP;MYBL2;NCAPG;NDC80;NEK2;PBK;POLA2;PRC1;PSMB2;RAD51AP1;RRM2;SNRPA1;SNRPD1;SNRPG;SPAG5;TOP2A;TPX2;TRIP13;U…
RPP40	10799	0.417	0.576	ribonuclease P/MRP 40kDa subunit	10799	AURKA;BLM;BUB1B;CCNA2;CCNB2;CDC20;CDKN3;CENPA;CENPF;CTPS;DLGAP5;EXO1;GINS1;KIF14;KIF2C;MCM6;MELK;MTHFD2;RAD51AP1;RFC4;SRPK1;STIL;TRIP13;TTK;UBE2C
CHAF1B	8208	0.415	1.628	chromatin assembly factor 1, subunit B (p60)	8208	AURKB;BIRC5;CCNB1;CCNB2;CCT5;CDC2;CDC20;CDC45L;CDCA8;CDKN3;CEBPG;CENPA;CENPE;CHEK1;CKS1B;DLGAP5;FEN1;GINS1;GPSM2;H2AFZ;IMPA2;KIAA0101;KPNA2;MAD2L1;MCM2;MCM6;MELK;NDC80;NEK2;NUP155;PLK4;POLA2;PSMB2;PSMD14;RAD51AP1;RNASEH2A;RRM2;SNRPC;SNRPD1;SNRPG;SPAG5;TPX2;UBE2C;UCK2;UQCRH
CXCL10	3627	0.415	1.458	chemokine (C-X-C motif) ligand 10	3627	APOBEC3B;BIRC5;CCNA2;CCNB2;CDC2;CDC20;CDKN3;CEBPG;CENPA;CHEK1;CKS2;DLGAP5;FEN1;KIF2C;KPNA2;MAD2L1;MCM2;MCM6;MELK;MYBL2;NDC80;PSMB2;RAD51AP1;RRM2;SNRPC;TPX2;TRIP13;TTK;UBE2C
KIF15	56992	0.415	0.996	kinesin family member 15	56992	ANP32E;ASPM;BIRC5;BUB1B;CCNA2;CCNB1;CCNB2;CDC2;CDCA3;CDCA8;CDKN3;CENPA;CENPE;CENPF;CENPN;CEP55;DLGAP5;DTL;ERCC6L;ESPL1;EZH2;FANCI;GPSM2;GTSE1;H2AFZ;HJURP;HMMR;KIF14;KIF18A;KIF18B;KIF20A;KIF4A;MAD2L1;MCM10;MELK;MKI67;MLF1IP;NCAPG;NEK2;PBK;PRC1;RAD51AP1;RFC4;SMC4;SNRPA1;TACC3;TRIP13;TTK;UBE2C;WDHD1;ZWINT
WDHD1	11169	0.415	0.739	WD repeat and HMG-box DNA binding protein 1	11169	ASPM;CCNB1;CDC2;CDKN3;CENPF;CEP55;DLGAP5;DTL;GINS1;KIF14;KIF15;KIF18A;KIF18B;KIF4A;MAD2L1;MLF1IP;NCAPG;NEK2;PBK;PRC1;RAD51AP1;SMC2
KIF4A	24137	0.414	1.046	kinesin family member 4A	24137	ANP32E;ASPM;AURKA;BIRC5;BUB1B;CCNA2;CCNB1;CCNB2;CDC2;CDC20;CDCA3;CDCA8;CDKN3;CENPA;CENPE;CENPF;CENPN;CEP55;DLGAP5;DTL;ERCC6L;ESPL1;EXO1;EZH2;FANCI;FEN1;GINS1;GPSM2;GTSE1;H2AFZ;HJURP;HMMR;KIAA0101;KIF14;KIF15;KIF18A;KIF18B;KIF20A;KIF2C;KPNA2;MAD2L1;MCM10;MCM2;MELK;MKI67;MLF1IP;NCAPG;NCAPH;NEK2;PBK;PLK1;PRC1;RAD51AP1;RFC4;RNASEH2A;RRM2;SMC4;SNRPA1;SPAG5;TACC3;TOP2A;TPX2;TRIP13;TTK;UBE2C;WDHD1;ZWINT
DKC1	1736	0.413	0.737	dyskeratosis congenita 1, dyskerin	1736	AMD1;ANP32E;ASPM;BIRC5;CCNB1;CCT5;CCT6A;CDC2;CDC45L;CDCA3;CDCA8;CEBPG;CENPA;CENPE;CENPN;CEP55;CHEK1;CKS1B;CTPS;DBF4;ERCC6L;FEN1;GINS1;GPSM2;GTSE1;H2AFZ;HJURP;HPRT1;IMPA2;IRAK1;KIF18B;KPNA2;LAPTM4B;MAD2L1;MCM7;MELK;MTHFD2;NCAPG;NUP155;NUP205;PBK;PRC1;PSMB2;RAD51AP1;RFC4;SLC7A5;SNRPA1;SNRPC;SNRPD1;TPX2;TRIP13;UBE2V2;UCK2;UQCRH
KIF18A	81930	0.412	1.388	kinesin family member 18A	81930	ANP32E;ASPM;BIRC5;CCNB1;CCNB2;CDC2;CDCA3;CDCA8;CDKN3;CENPA;CENPE;CENPF;CENPN;CEP55;DBF4;DLGAP5;DTL;ERCC6L;ESPL1;FANCI;GPSM2;GTSE1;H2AFZ;HJURP;HMMR;KIF14;KIF15;KIF18B;KIF20A;KIF4A;KPNA2;MAD2L1;MCM10;MELK;MLF1IP;NCAPG;NEK2;PBK;PRC1;RAD51AP1;RRM2;SMC4;SNRPA1;TACC3;TPX2;TTK;WDHD1;ZWINT
SNRPG	6637	0.41	0.698	small nuclear ribonucleoprotein polypeptide G	6637	CBX3;CCNB1;CCNB2;CCT5;CCT6A;CDC2;CDC45L;CDCA8;CDKN3;CEBPG;CENPA;CENPN;CHAF1B;CKS1B;CKS2;CYCS;DBF4;EMG1;ERCC6L;GINS1;H2AFZ;HMGB2;KIAA0101;MAD2L1;MCM6;MELK;MLF1IP;MTHFD2;NCAPG;NDC80;NDUFA9;NUP155;PBK;POLA2;POLR2K;PRC1;PSMB2;PSMD14;RAD51AP1;RRM2;SHFM1;SNRPA1;SNRPC;SNRPD1;TACC3;UBE2V2;UCK2;UQCRH;VRK1
HMGA1	3159	0.409	0.886	high mobility group AT-hook 1	3159	BIRC5;BUB1B;CCNA2;CCNB2;CDC20;CENPA;CTPS;DLGAP5;EZH2;FEN1;GTSE1;IMPA2;KIF11;KIF14;KIF2C;KIFC1;KPNA2;MAD2L1;MCM2;MCM3;MCM6;MCM7;MELK;MKI67;MYBL2;NCAPH;NDC80;NEK2;PLK1;PTDSS1;RAD51AP1;RRM2;SLC7A5;SNRPC;SRPK1;TPX2;TRIP13;TTK;UBE2C;UCK2
EMG1	10436	0.408	0.567	EMG1 nucleolar protein homolog (S. cerevisiae)	10436	CKS1B;NCAPD2;NDUFA9;POLR2K;RAD51AP1;SNRPD1;SNRPG;STRAP;UCK2
NAE1	8883	0.407	0.552	NEDD8 activating enzyme E1 subunit 1	8883	AMD1;CCT5;CCT6A;CENPA;CHEK1;CKS1B;CYCS;DBF4;DEK;DPM1;H2AFZ;IMPA2;MAD2L1;MCM6;MELK;MSH2;RAD51AP1;RFC3;RFC4;SNRPC;SNRPD1;UBE2V2;UQCRH
KIF20A	10112	0.406	1.089	kinesin family member 20A	10112	ASPM;AURKA;AURKB;BIRC5;BUB1B;CCNA2;CCNB1;CCNB2;CDC2;CDC20;CDCA3;CDCA8;CDKN3;CENPA;CENPE;CENPF;CENPN;CEP55;CKS2;DLGAP5;DTL;ERCC6L;ESPL1;EXO1;EZH2;FANCI;GPSM2;GTSE1;H2AFZ;HJURP;HMMR;KIAA0101;KIF11;KIF14;KIF15;KIF18A;KIF18B;KIF2C;KIF4A;MAD2L1;MCM10;MCM6;MELK;MKI67;MLF1IP;MYBL2;NCAPG;NCAPH;NDC80;NEK2;PBK;PLK1;PRC1;RAD51AP1;RRM2;SPAG5;TACC3;TOP2A;TPX2;TRIP13;TTK;UBE2C;ZWINT
UBE2V2	7336	0.406	0.655	ubiquitin-conjugating enzyme E2 variant 2	7336	AMD1;CBX3;CCNB1;CCT5;CCT6A;CDC2;CDCA8;CEBPG;CENPA;CENPN;CKS1B;CKS2;CYCS;DBF4;DEK;DKC1;DPM1;GGH;GINS1;GPSM2;H2AFZ;HMGB2;KPNA2;LAPTM4B;MAD2L1;MELK;MTHFD2;NAE1;NCAPG;NUP155;POLR2K;PSMD14;RAD51AP1;SNRPC;SNRPD1;SNRPG;STRAP;TAF2;UQCRH;VRK1;XPOT
LAPTM4B	55353	0.405	0.996	lysosomal protein transmembrane 4 beta	55353	AMD1;BIRC5;CCNB1;CCNB2;CCT5;CDC2;CDC20;CDCA3;CDCA8;CDKN3;CENPA;CENPE;CENPN;CHEK1;CKS1B;CTPS;CYCS;DKC1;DLGAP5;FEN1;GGH;GINS1;GPSM2;H2AFZ;IMPA2;KPNA2;MAD2L1;MCM6;NEK2;NUP155;POLR2K;PSMB2;PTDSS1;RAD51AP1;RRM2;SNRPC;SNRPD1;TPX2;TRIP13;UBE2C;UBE2V2;UCK2;UQCRH
TMPO	7112	0.403	0.588	thymopoietin	7112	AURKA;AURKB;BIRC5;BUB1B;CCNA2;CCNB2;CCNE2;CDC2;CDC20;CDC6;CDKN3;CENPA;CENPF;CHEK1;DLGAP5;EXO1;FEN1;GINS1;GTSE1;HMMR;KIAA0101;KIF11;KIF14;KIF23;KIF2C;KIFC1;MAD2L1;MCM2;MCM6;MELK;MKI67;MYBL2;NCAPD2;NEK2;PLK4;RAD51AP1;RFC3;RRM2;SMC4;SPAG5;SPC25;SRPK1;STIL;TOP2A;TPX2;TRIP13;TTK;UBE2C;ZWINT
TPI1	7167	0.402	0.478	triosephosphate isomerase 1	7167
CDT1	81620	0.401	0.996	chromatin licensing and DNA replication factor 1	81620	AURKA;AURKB;BIRC5;BLM;BUB1B;CCNA2;CCNB2;CDC2;CDC20;CDC25A;CDC6;CDKN3;CENPA;CENPF;CHEK1;CTPS;DLGAP5;E2F1;ESPL1;EXO1;EZH2;FEN1;GINS1;GTSE1;HMMR;KIF11;KIF14;KIF2C;KIFC1;MAD2L1;MCM2;MCM3;MCM6;MCM7;MELK;MKI67;MYBL2;NCAPD2;NCAPH;NEK2;PLK1;RAD51AP1;RNASEH2A;RRM2;SLC7A5;SPAG5;SPC25;SRPK1;STIL;TK1;TPX2;TRIP13;TTK;UBE2C;ZWINT
PHGDH	26227	0.401	0.972	phosphoglycerate dehydrogenase	26227	AMD1;BLM;BUB1B;CCNA2;CCNB2;CDC20;CDC25A;CEBPG;CENPA;CENPF;CHEK1;CTPS;CTSL2;DLGAP5;EXO1;EZH2;GTSE1;IMPA2;KIF14;KIF2C;MCM2;MCM3;MCM6;MCM7;MELK;MKI67;NCAPD2;NUP205;RAD51AP1;RFC4;SLC7A5;SRPK1;STIL;STMN1;TMSB15A;TPX2;TRIP13;TTK;UBE2C;UQCRH
COQ2	27235	0.4	0.534	coenzyme Q2 homolog, prenyltransferase (yeast)	27235	BIRC5;CCNA2;CCNB2;CDC2;CDKN3;CEBPG;CENPA;CENPE;CKS2;DLGAP5;H2AFZ;HMGB2;KPNA2;MAD2L1;MCM6;MELK;NDC80;POLR2K;PSMD14;RAD51AP1;RRM2
